# Supplementary material
Source: Research Square preprint supplement (doi:10.21203/rs.3.rs-9835155/v1)
Supplement: Supplementary file 1 [file 852da2db955bcf0b1e91608e.pdf]

# **Codon bias coevolves with longevity**

## **Supplementary material**

### **Contents**

|                                                                                                                                                                          |           |
|--------------------------------------------------------------------------------------------------------------------------------------------------------------------------|-----------|
| <b>Impact of GC content of coding genomes on codon bias of mammalian species.....</b>                                                                                    | <b>2</b>  |
| <b>Changes in codon usage and evolution of longevity in mammalian species .....</b>                                                                                      | <b>13</b> |
| <b>Copy number of tRNA genes in metazoa and impact of GC content of coding genomes and lifespan on relative synonymous codon usage (RSCU) of mammalian species .....</b> | <b>43</b> |
| <b>GC content of the coding genomes and relative synonymous codon usage (RSCU) of 96 mammalian species with known lifespan .....</b>                                     | <b>44</b> |

## **Impact of GC content of coding genomes on codon bias of mammalian species**

The file presents the plots reflecting the impact of GC content of coding genomes on codon bias of mammalian species. The parameters of the regression analyses of these plots are presented in Supplementary file 2.

The plots are presented in alphabetical order of the names of the amino acids; data for amino acids Met and Trp that are encoded by a single codon are not shown.

We also present the data for the three stop codons at the end of the list of the 18 amino acids encoded by more than one synonymous codon.

In the case of the 18 amino acids and the termination codons the figures present the plots reflecting the impact of the GC content of the coding genome of mammalian species on the relative synonymous codon usage (RSCU) of the given amino acid or termination codons. In these analyses we have plotted the RSCU values as a function of the GC-content of the coding genomes of the 96 mammalian species included in the present analysis.

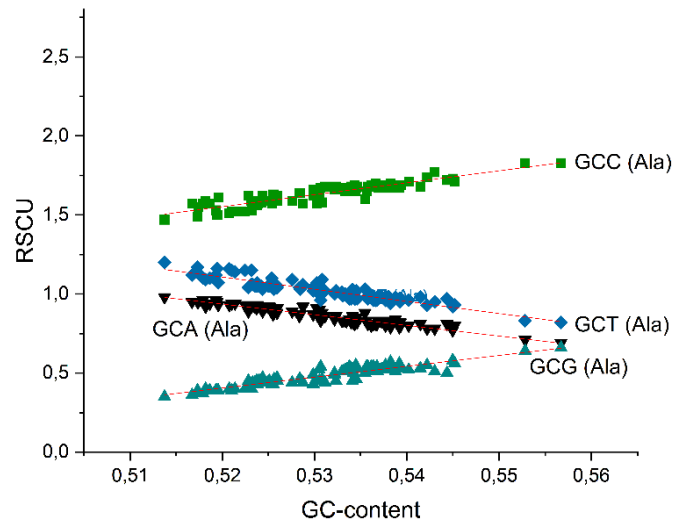

**Supplementary figure 1.a.** Impact of the GC content of coding genomes of mammalian species on their relative synonymous codon usage (RSCU) of the four **alanine** codons.

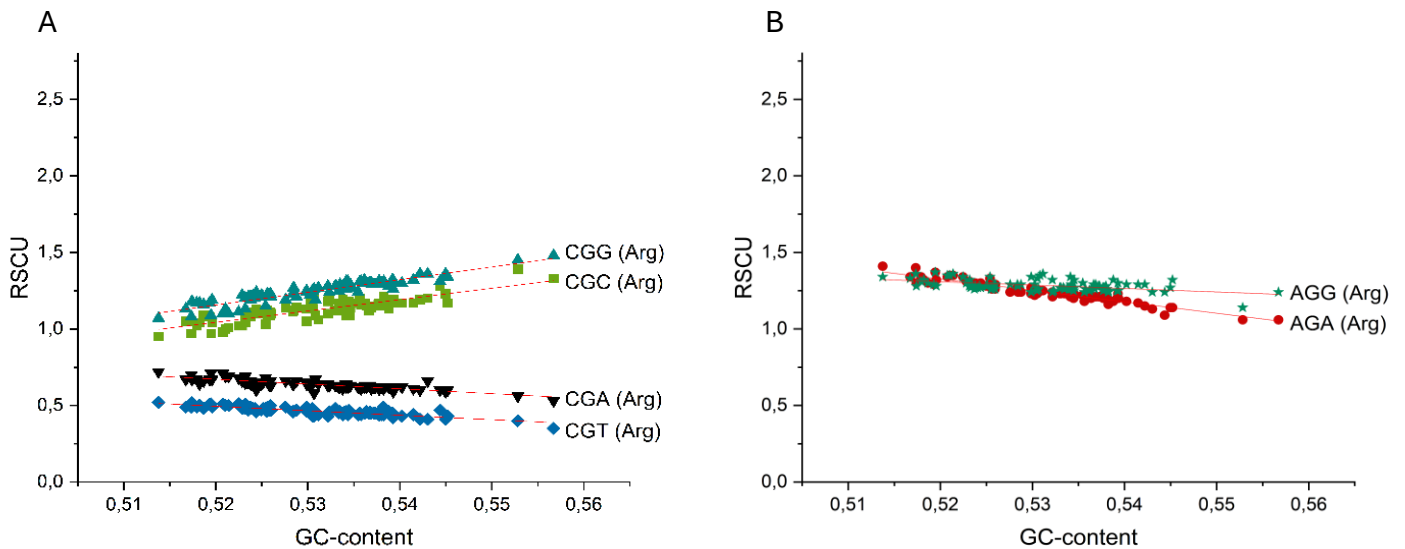

**Supplementary figure 2.a.** Impact of the GC content of coding genomes of mammalian species on their relative synonymous codon usage (RSCU) of the six **arginine** codons.

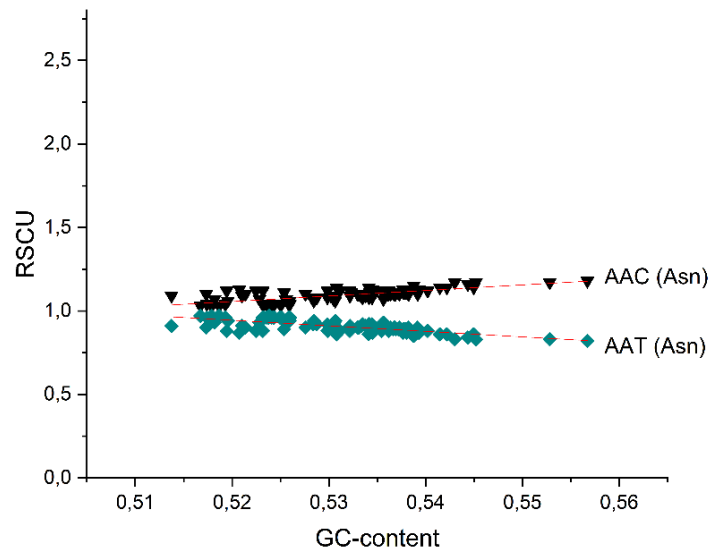

**Supplementary figure 3.a.** Impact of the GC content of coding genomes of mammalian species on their relative synonymous codon usage (RSCU) of the two **asparagine** codons.

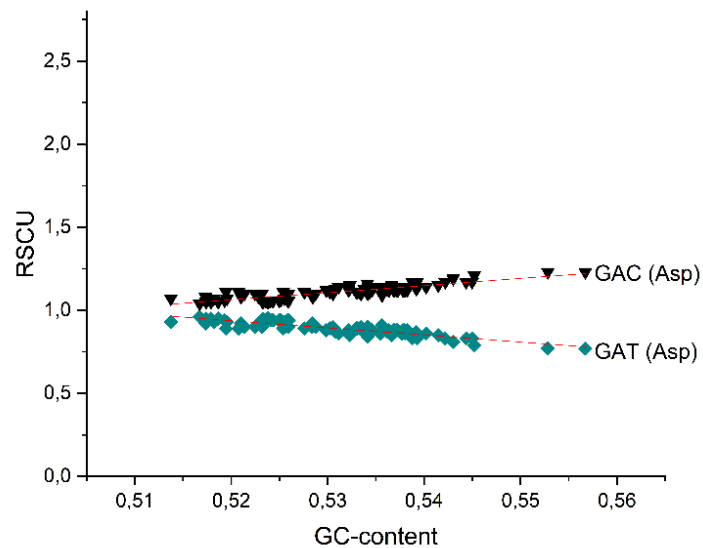

**Supplementary figure 4.a.** Impact of the GC content of coding genomes of mammalian species on their relative synonymous codon usage (RSCU) of the two **aspartic acid** codons.

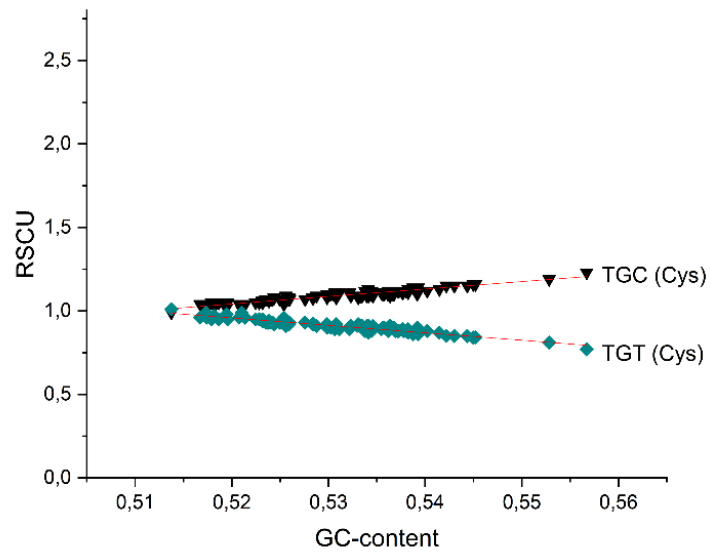

**Supplementary figure 5.a.** Impact of the GC content of coding genomes of mammalian species on their relative synonymous codon usage (RSCU) of the two **cysteine** codons.

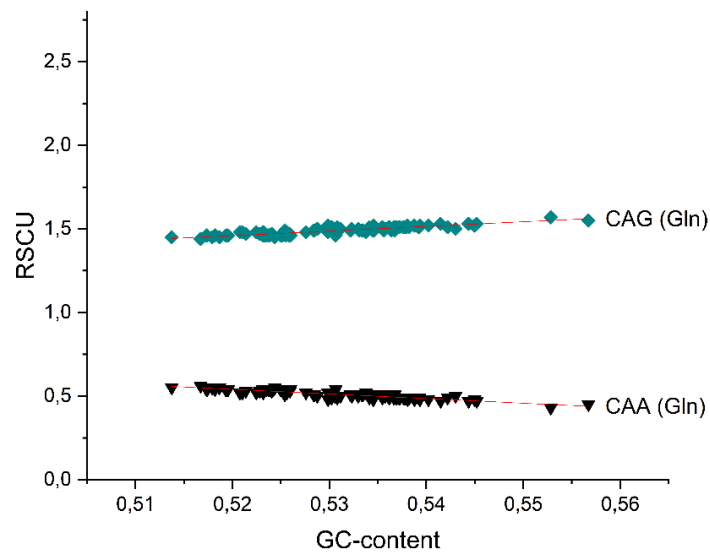

**Supplementary figure 6.a.** Impact of the GC content of coding genomes of mammalian species on their relative synonymous codon usage (RSCU) of the two **glutamine** codons.

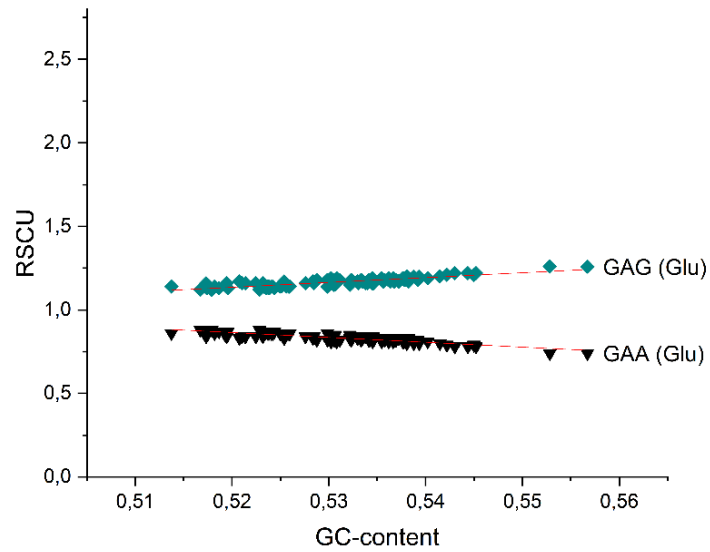

**Supplementary figure 7.a.** Impact of the GC content of coding genomes of mammalian species on their relative synonymous codon usage (RSCU) of the two **glutamic acid** codons.

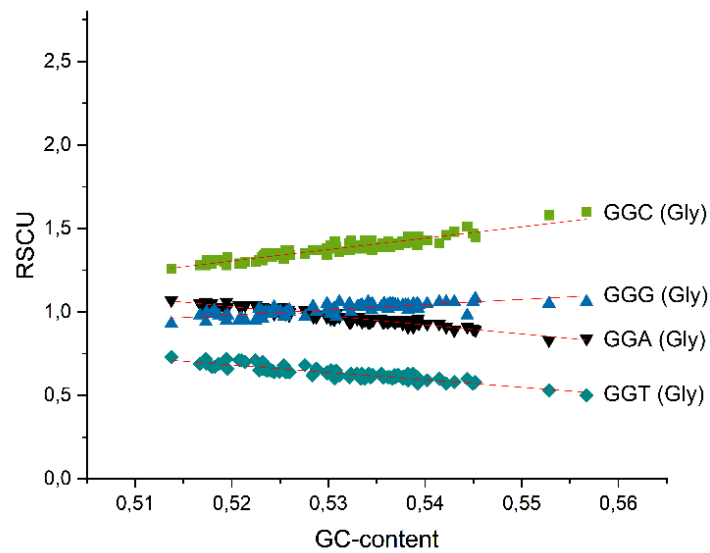

**Supplementary figure 8.a.** Impact of the GC content of coding genomes of mammalian species on their relative synonymous codon usage (RSCU) of the four **glycine** codons.

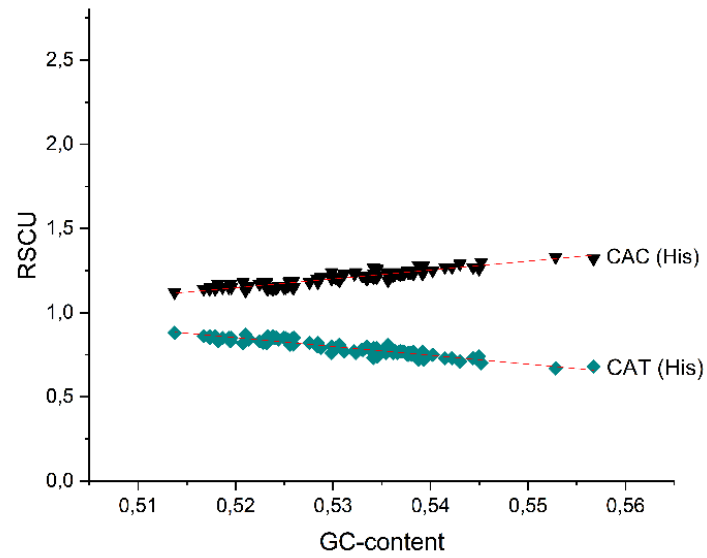

**Supplementary figure 9.a.** Impact of the GC content of coding genomes of mammalian species on their relative synonymous codon usage (RSCU) of the two **histidine** codons.

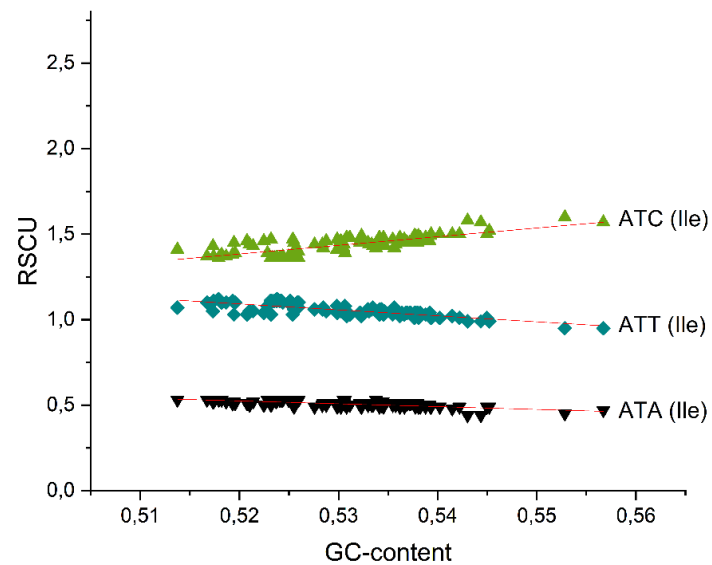

**Supplementary figure 10.a.** Impact of the GC content of coding genomes of mammalian species on their relative synonymous codon usage (RSCU) of the three **isoleucine** codons.

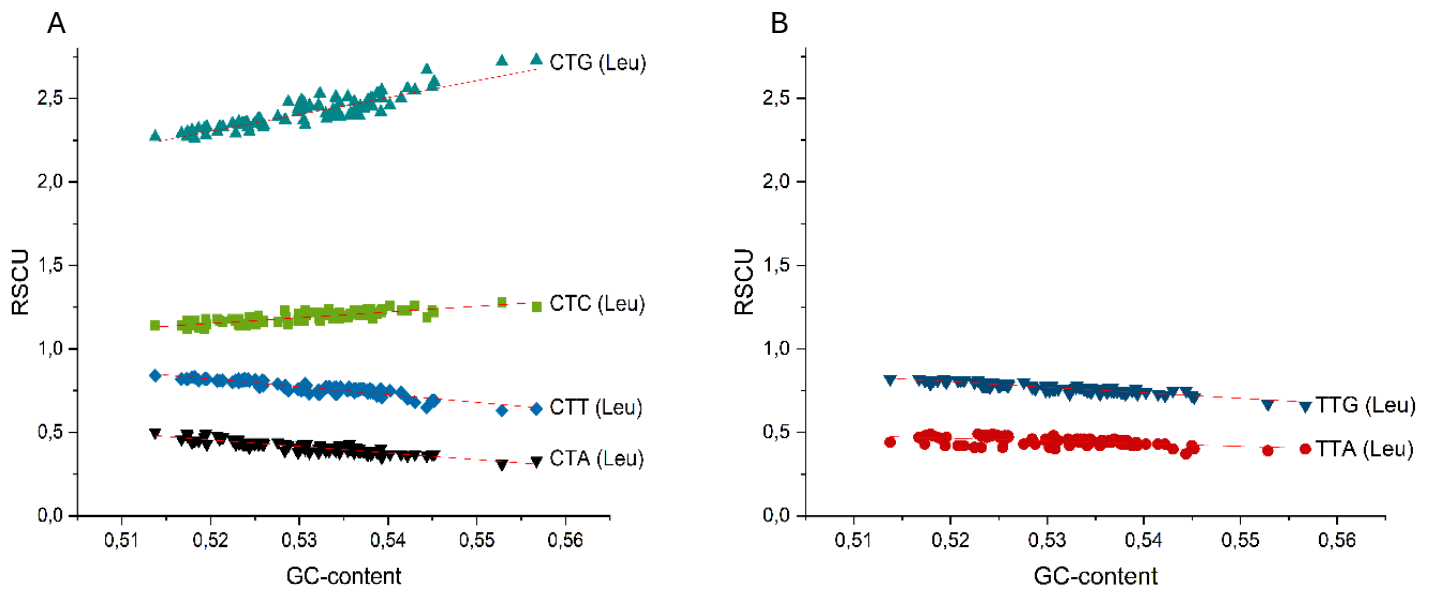

**Supplementary figure 11.a.** Impact of the GC content of coding genomes of mammalian species on their relative synonymous codon usage (RSCU) of the six **leucine** codons.

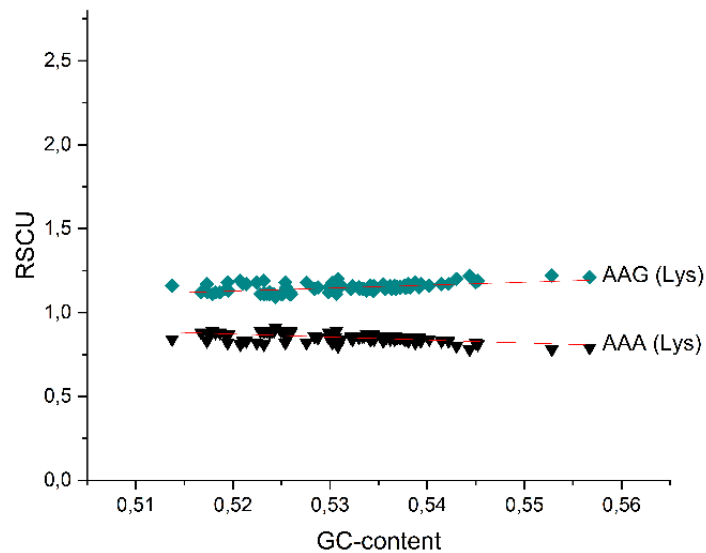

**Supplementary figure 12.a.** Impact of the GC content of coding genomes of mammalian species on their relative synonymous codon usage (RSCU) of the two **lysine** codons.

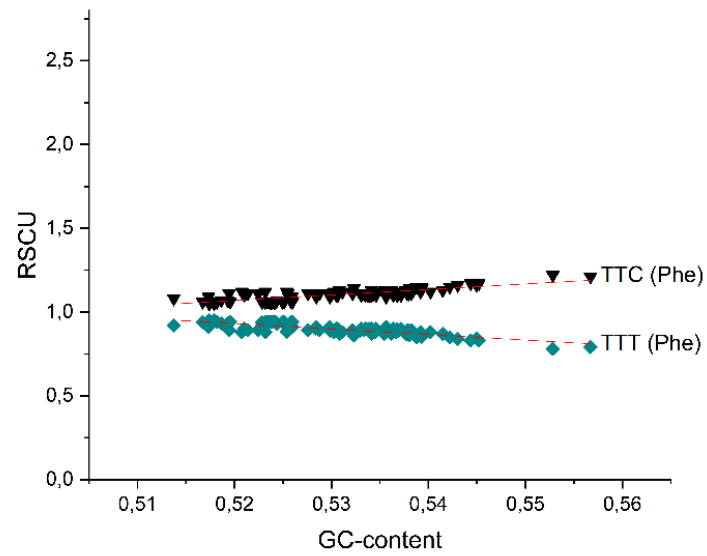

**Supplementary figure 13.a.** Impact of the GC content of coding genomes of mammalian species on their relative synonymous codon usage (RSCU) of the two **phenylalanine** codons.

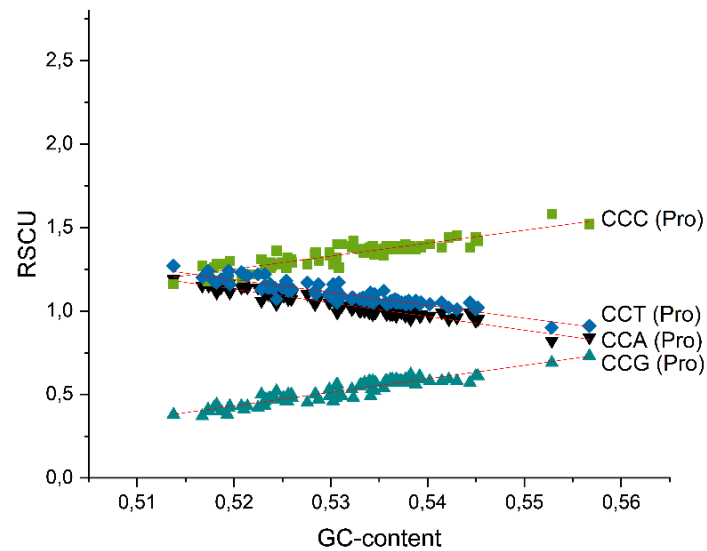

**Supplementary figure 14.a.** Impact of the GC content of coding genomes of mammalian species on their relative synonymous codon usage (RSCU) of the four **proline** codons.

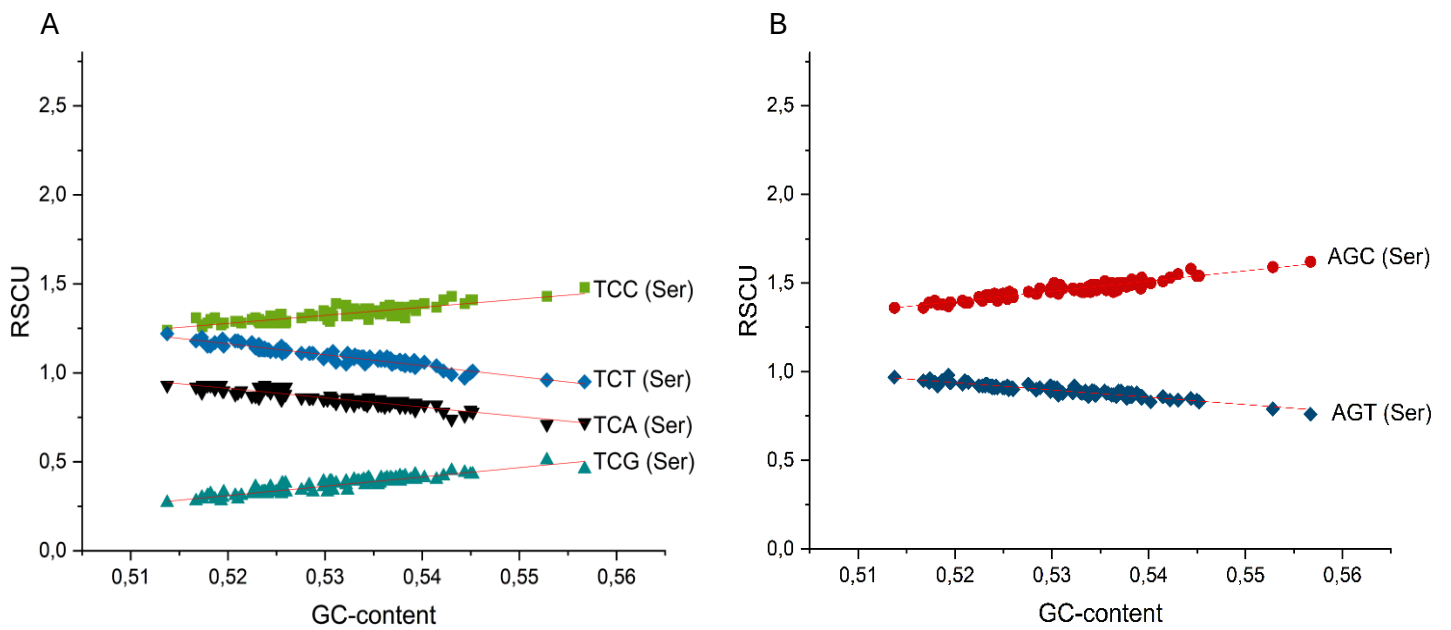

**Supplementary figure 15.a.** Impact of the GC content of coding genomes of mammalian species on their relative synonymous codon usage (RSCU) of the six **serine** codons.

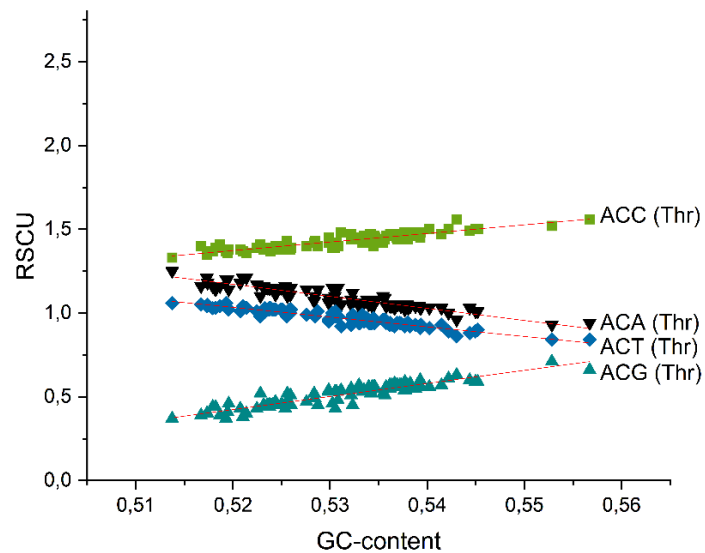

**Supplementary figure 16.a.** Impact of the GC content of coding genomes of mammalian species on their relative synonymous codon usage (RSCU) of the four **threonine** codons.

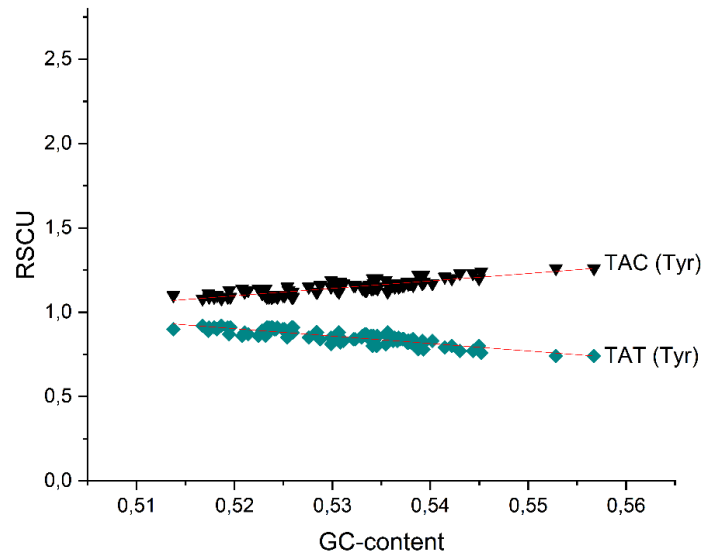

**Supplementary figure 17.a.** Impact of the GC content of coding genomes of mammalian species on their relative synonymous codon usage (RSCU) of the two **tyrosine** codons.

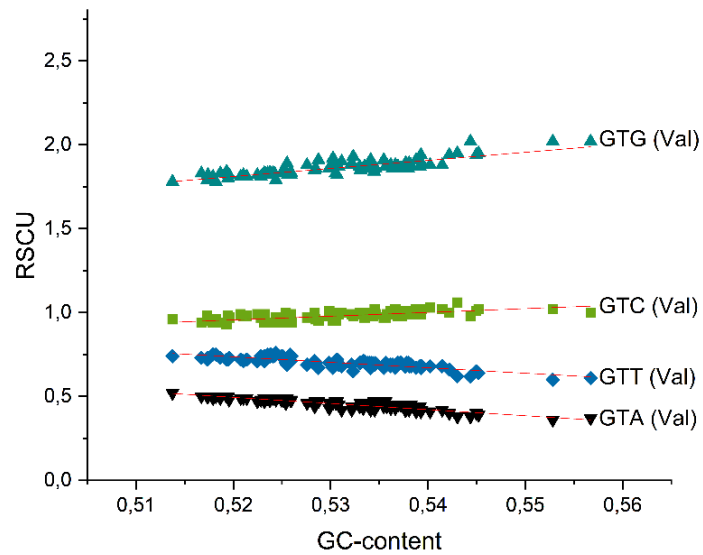

**Supplementary figure 18.a.** Impact of the GC content of coding genomes of mammalian species on their relative synonymous codon usage (RSCU) of the four **valine** codons.

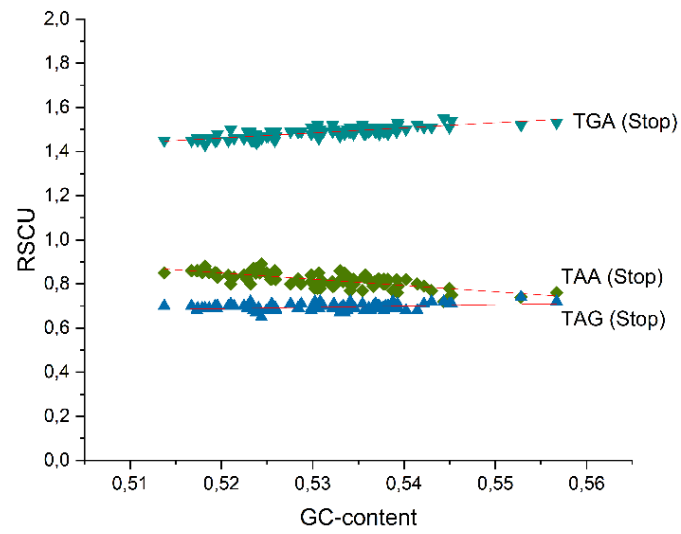

**Supplementary figure 19.a.** Impact of the GC content of coding genomes of mammalian species on their relative synonymous codon usage (RSCU) of the three **stop** codons.

## Changes in codon usage and evolution of longevity in mammalian species

The file presents the plots reflecting changes in codon usage as a function of the lifespan of mammalian species. Note that in these analyses we have subtracted the RSCU values expected at the given GC content ( $RSCU_{exp}$ ) from the actual RSCU values ( $RSCU_{obs}$ ) and plotted these deviations as a function of the known lifespan (years) of the species. The parameters of the regression analyses of these plots are presented in Supplementary file 2.

The plots are presented in alphabetical order of the names of the amino acids; data for amino acids Met and Trp that are encoded by a single codon are not shown. We also present the data for the three stop codons at the end of the list of the 18 amino acids encoded by more than one synonymous codon.

In the case of the 18 amino acids and the termination codons the first figures (**Supplementary figures x.a**) present the plots reflecting changes in codon usage as a function of the lifespan of 19 rodent species. The second figures (**Supplementary figures x.b**) present the plots reflecting changes in codon usage as a function of the lifespan of the 96 mammalian species included in the present analysis.

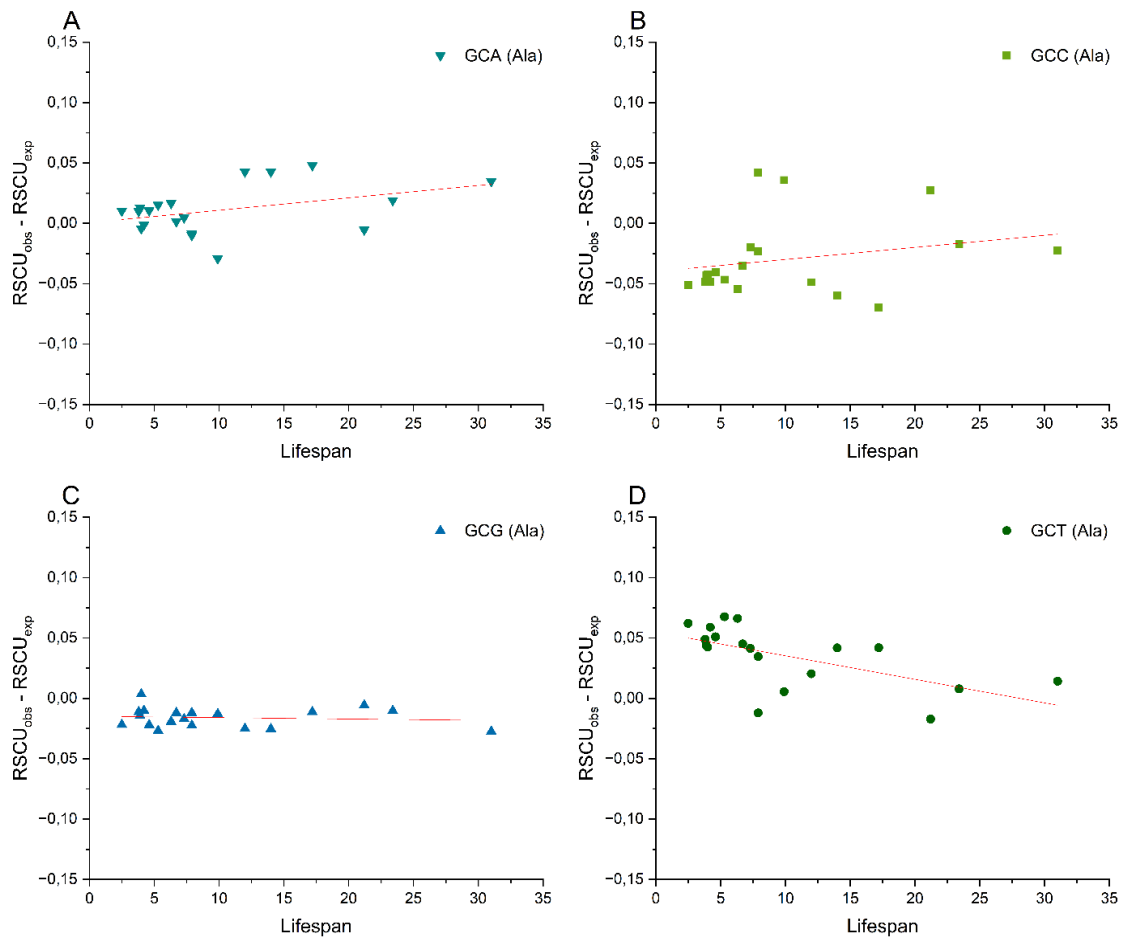

**Supplementary figure 1.a.** Differences between observed and expected relative synonymous codon usage (RSCU) values for codons encoding **alanine**, plotted against maximum lifespan (years) of 19 **rodent** species.

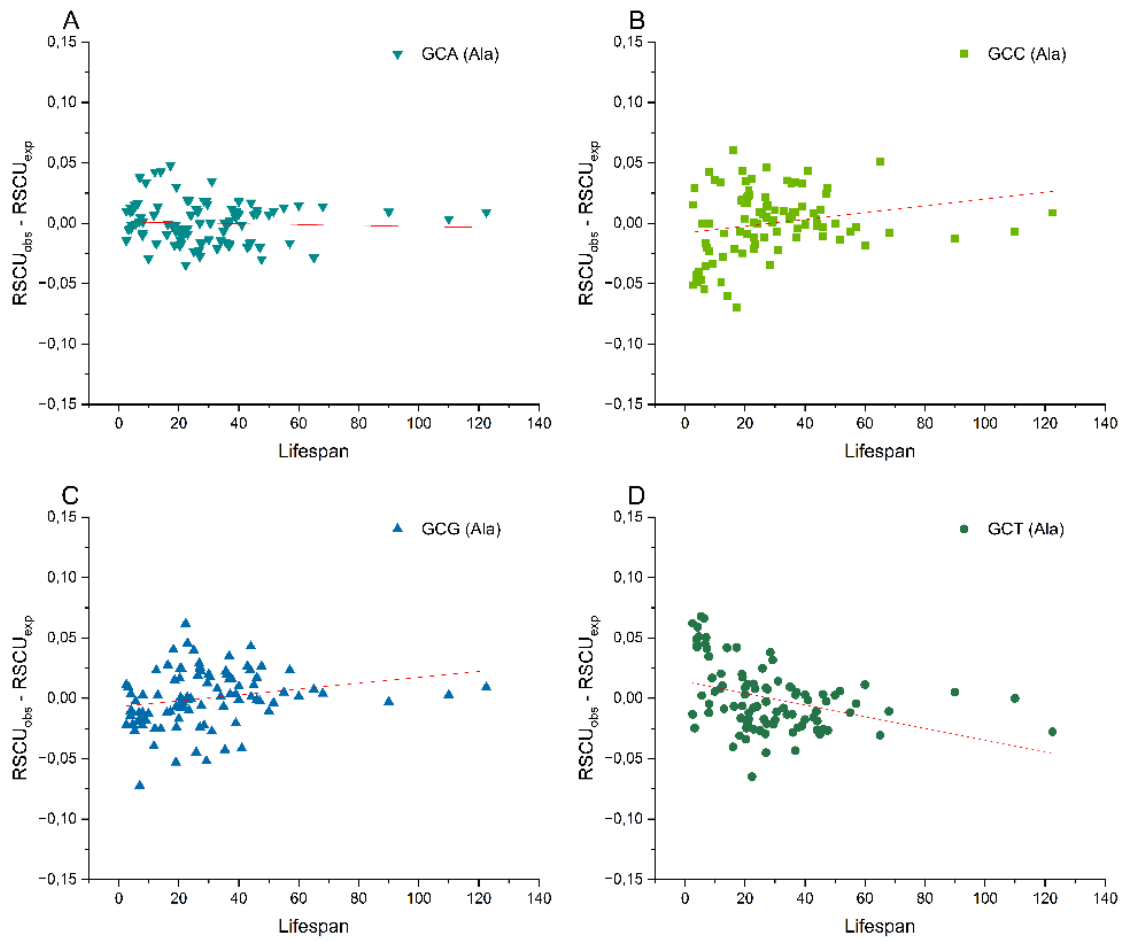

**Supplementary figure 1.b.** Differences between observed and expected relative synonymous codon usage (RSCU) values for codons encoding **alanine**, plotted against maximum lifespan (years) of 96 **mammalian** species.

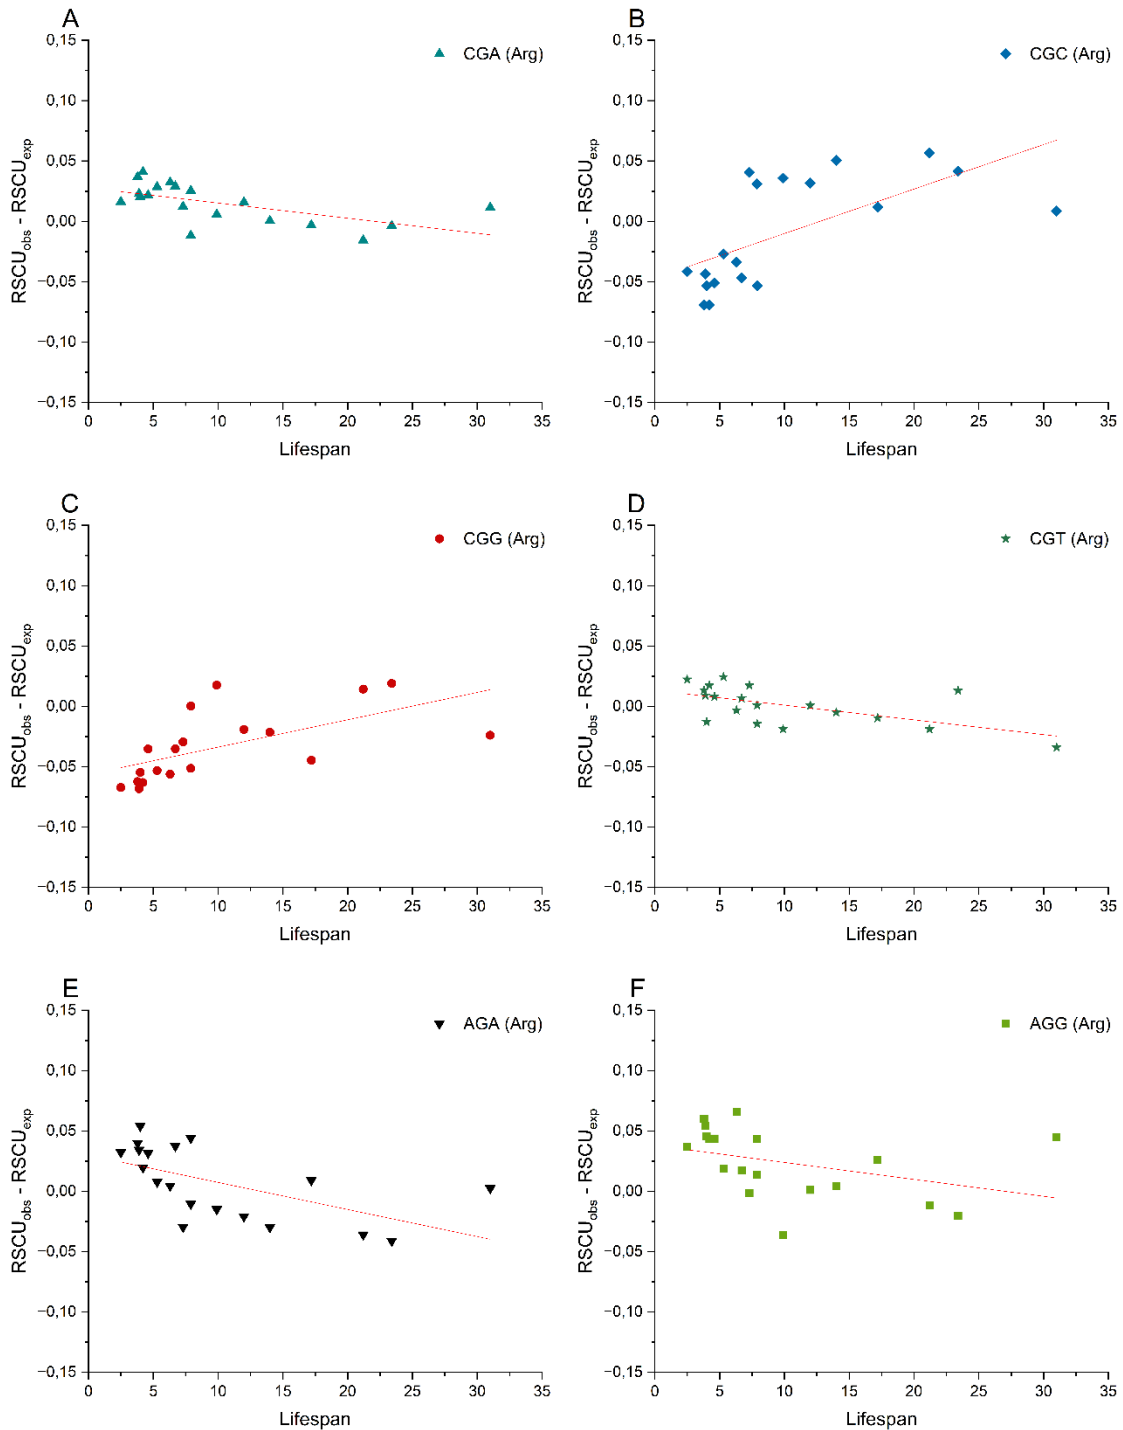

**Supplementary figure 2.a.** Differences between observed and expected relative synonymous codon usage (RSCU) values for codons encoding **arginine**, plotted against maximum lifespan (years) of 19 **rodent** species.

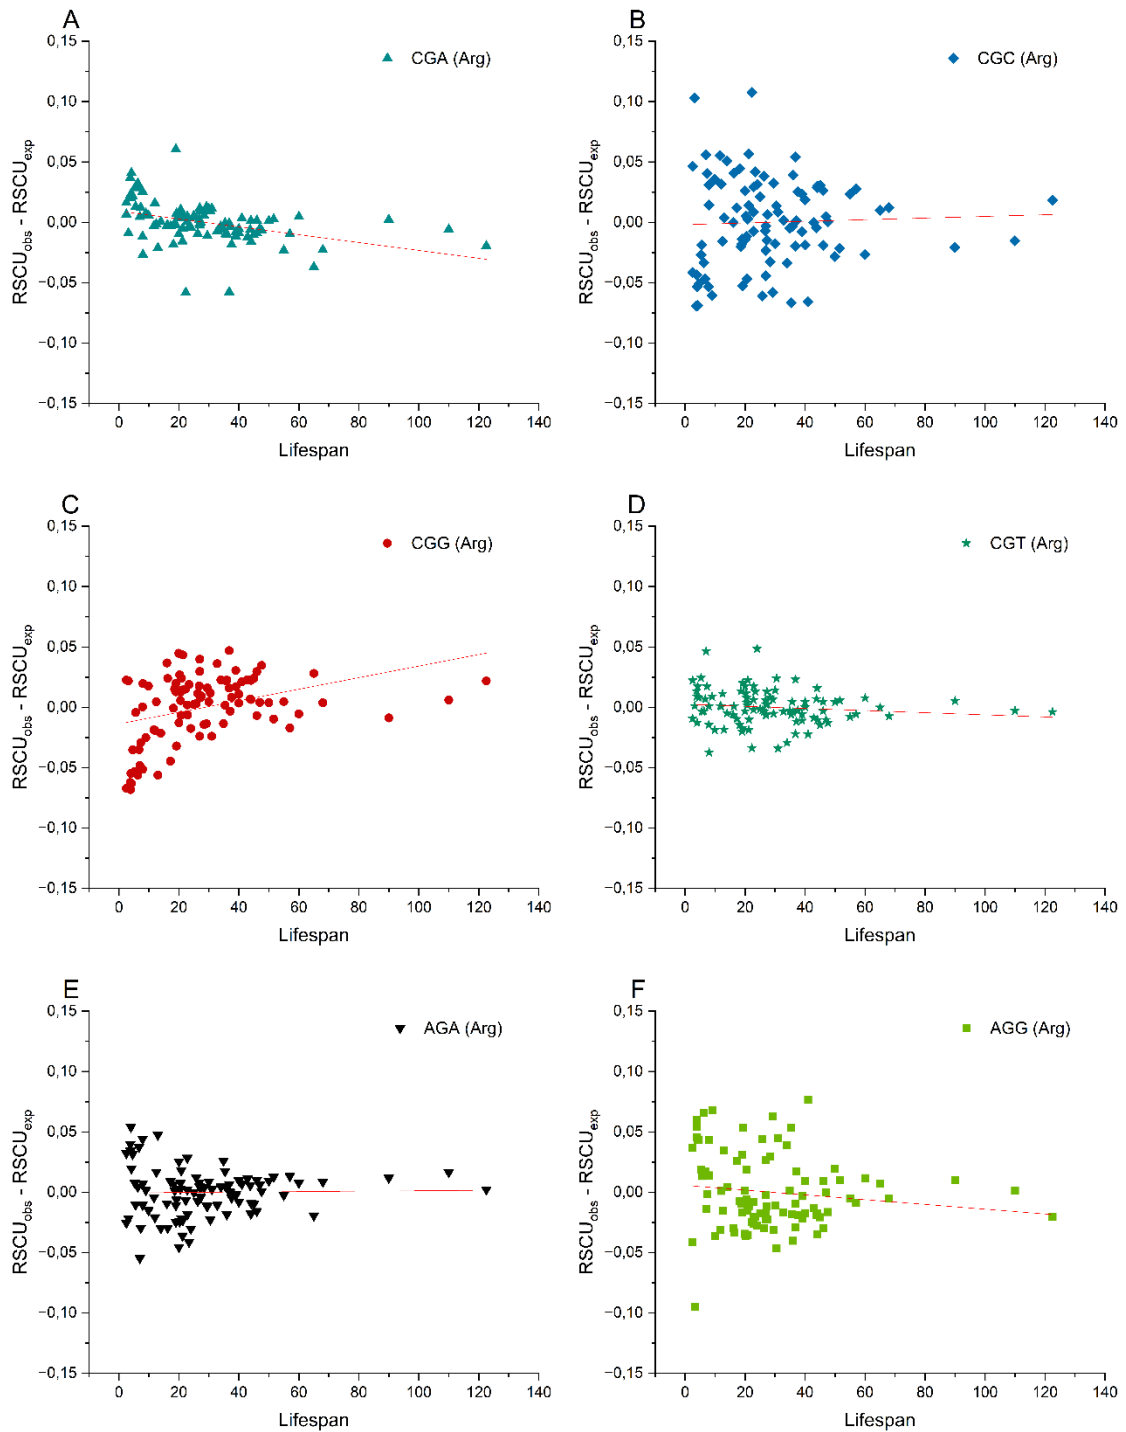

**Supplementary figure 2.b.** Differences between observed and expected relative synonymous codon usage (RSCU) values for codons encoding **arginine**, plotted against maximum lifespan (years) of 96 **mammalian** species.

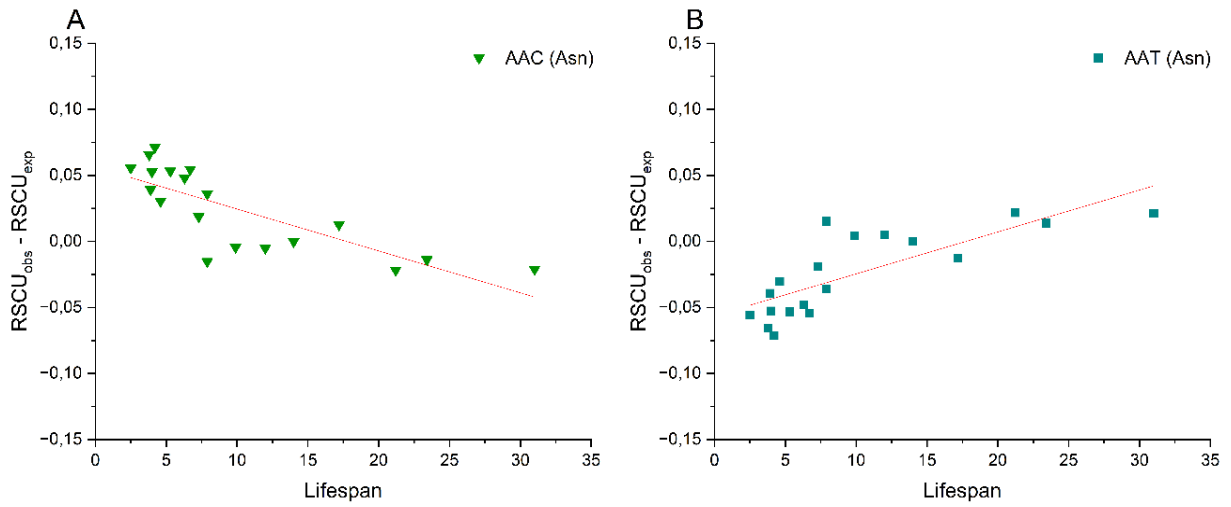

**Supplementary figure 3.a.** Differences between observed and expected relative synonymous codon usage (RSCU) values for codons encoding **asparagine**, plotted against maximum lifespan (years) of 19 **rodent** species.

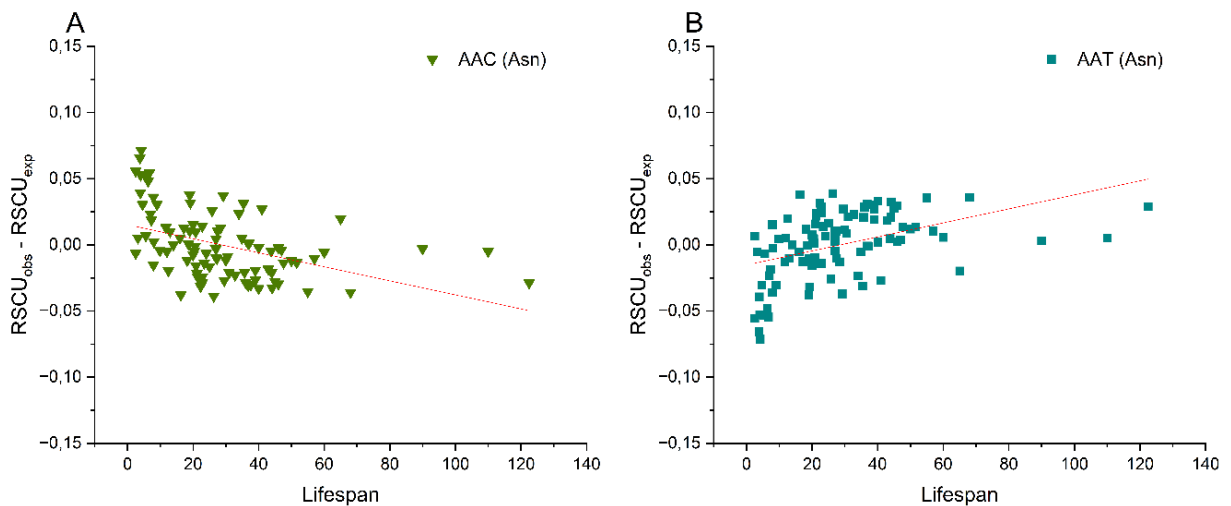

**Supplementary figure 3.b.** Differences between observed and expected relative synonymous codon usage (RSCU) values for codons encoding **asparagine**, plotted against maximum lifespan (years) of 96 **mammalian** species.

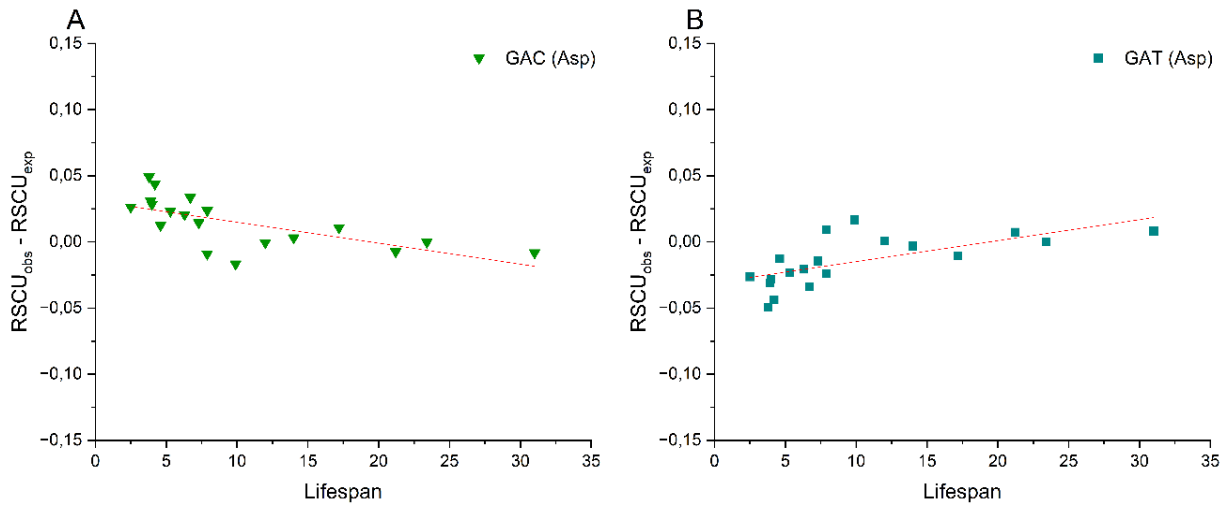

**Supplementary figure 4.a.** Differences between observed and expected relative synonymous codon usage (RSCU) values for codons encoding **aspartic acid**, plotted against maximum lifespan (years) of 19 **rodent** species.

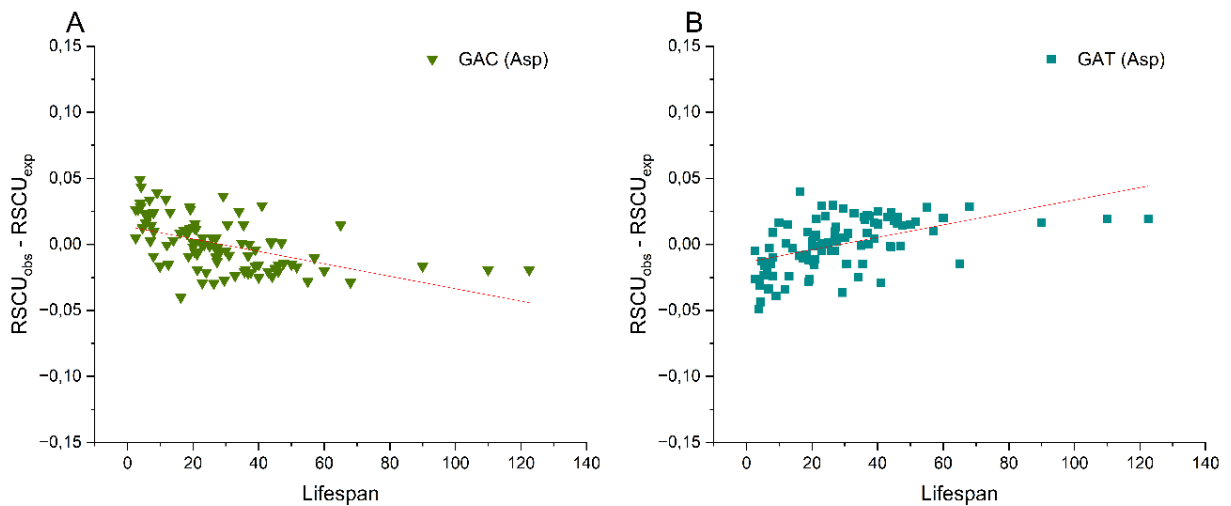

**Supplementary figure 4.b.** Differences between observed and expected relative synonymous codon usage (RSCU) values for codons encoding **aspartic acid**, plotted against maximum lifespan (years) of 96 **mammalian** species.

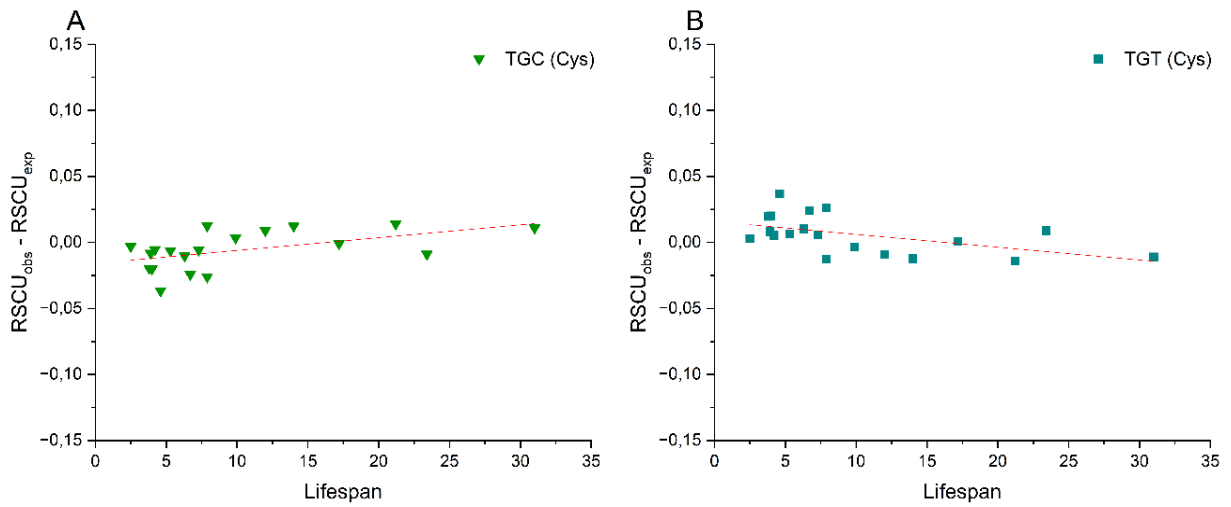

**Supplementary figure 5.a.** Differences between observed and expected relative synonymous codon usage (RSCU) values for codons encoding **cysteine**, plotted against maximum lifespan (years) of 19 **rodent** species.

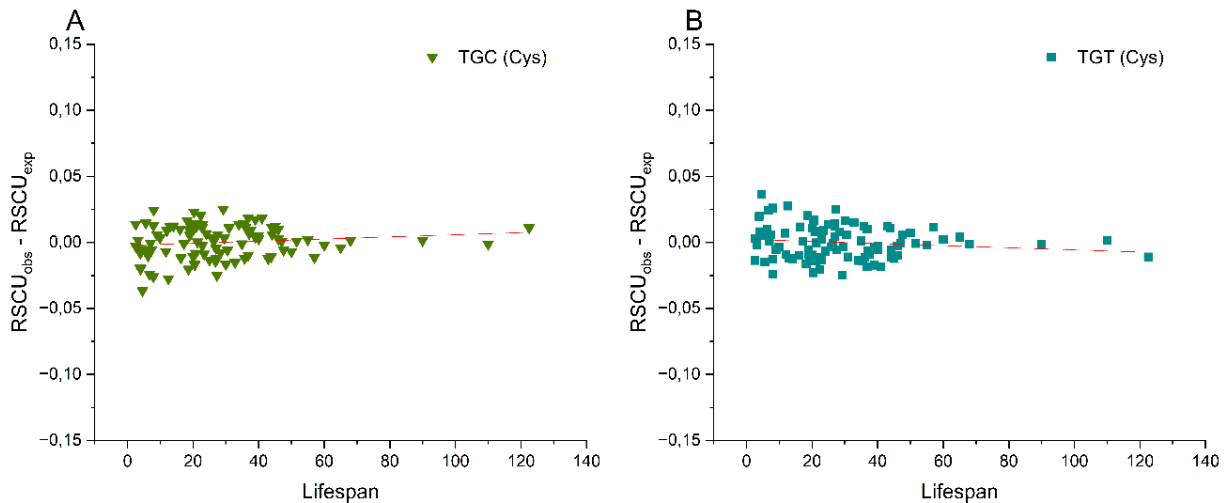

**Supplementary figure 5.b.** Differences between observed and expected relative synonymous codon usage (RSCU) values for codons encoding **cysteine**, plotted against maximum lifespan (years) of 96 **mammalian** species.

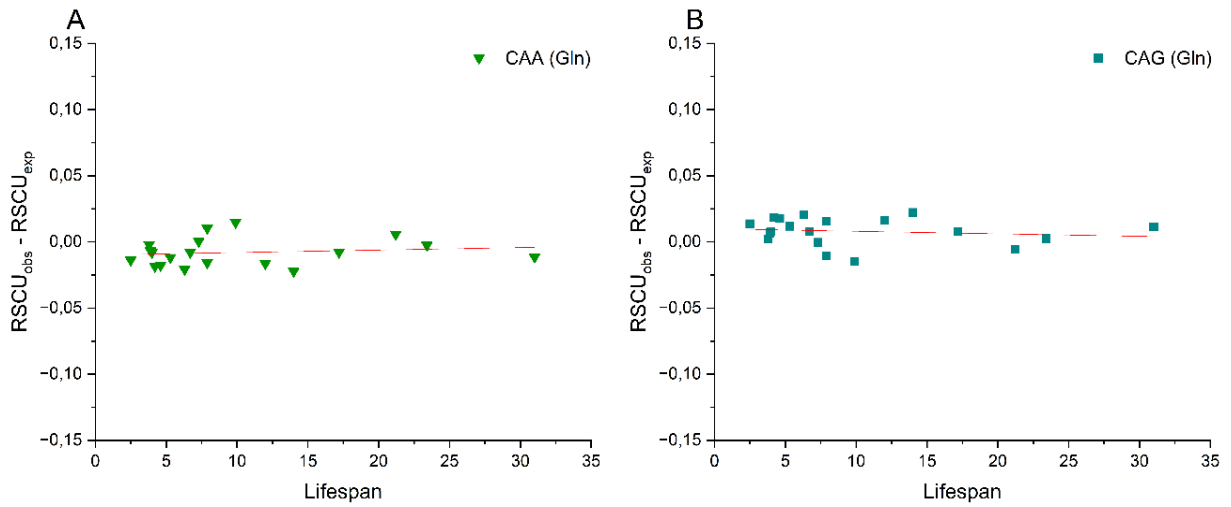

**Supplementary figure 6.a.** Differences between observed and expected relative synonymous codon usage (RSCU) values for codons encoding **glutamine**, plotted against maximum lifespan (years) of 19 **rodent** species.

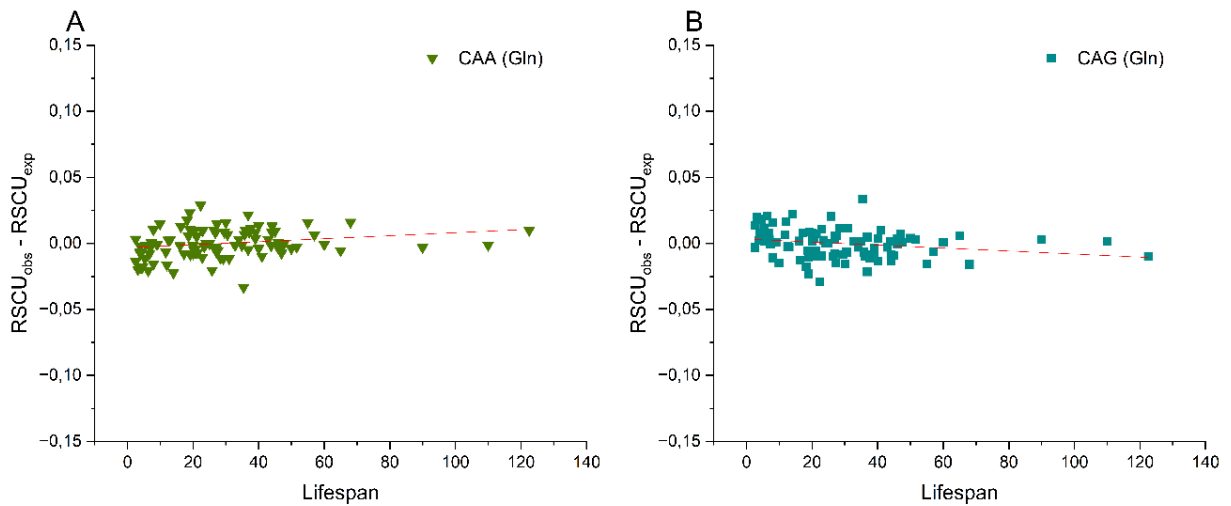

**Supplementary figure 6.b.** Differences between observed and expected relative synonymous codon usage (RSCU) values for codons encoding **glutamine**, plotted against maximum lifespan (years) of 96 **mammalian** species.

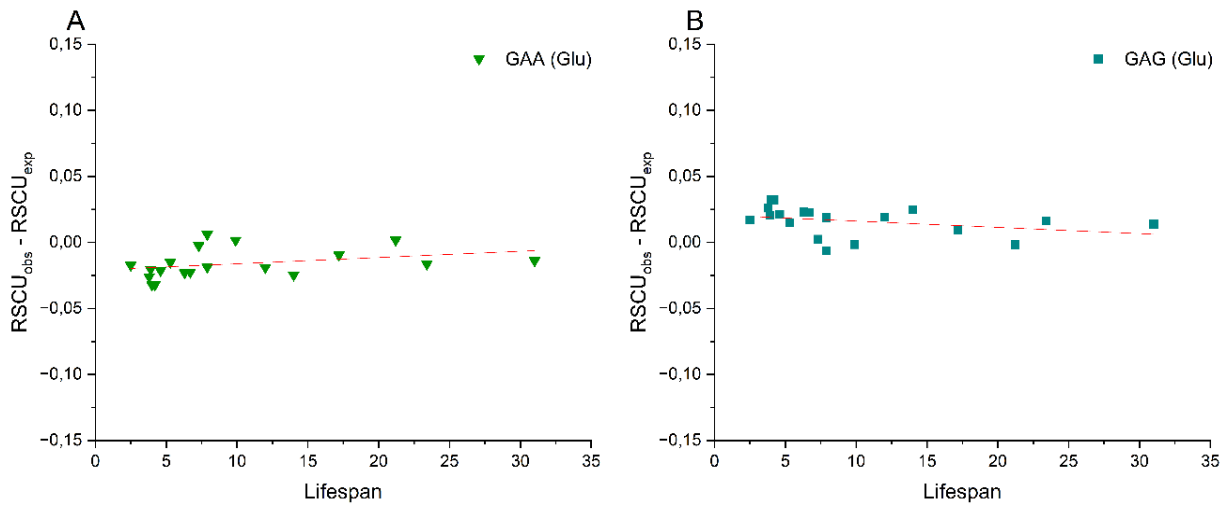

**Supplementary figure 7.a.** Differences between observed and expected relative synonymous codon usage (RSCU) values for codons encoding **glutamic acid**, plotted against maximum lifespan (years) of 19 **rodent** species.

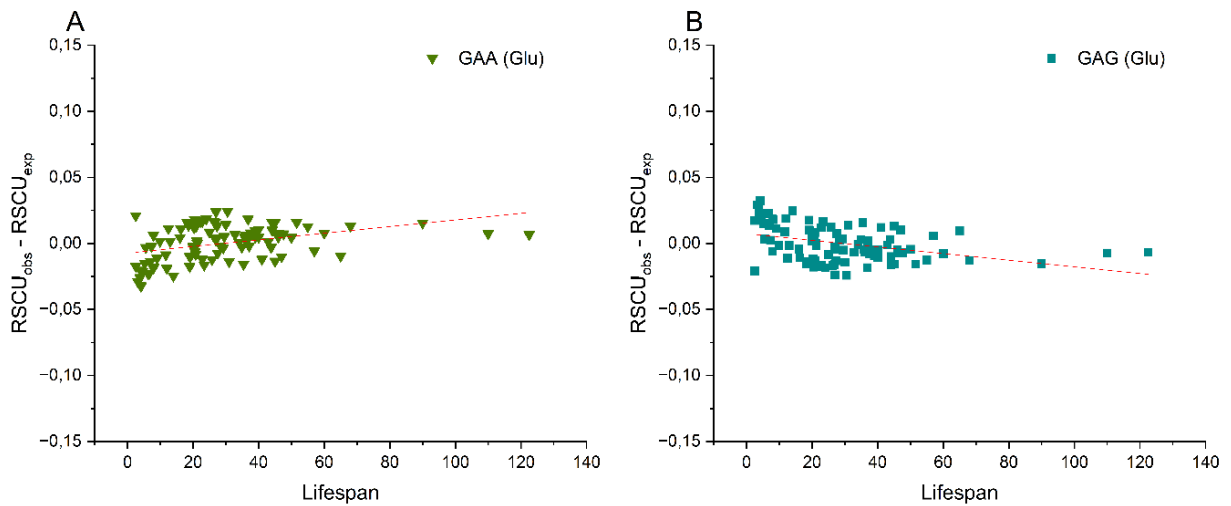

**Supplementary figure 7.b.** Differences between observed and expected relative synonymous codon usage (RSCU) values for codons encoding **glutamic acid**, plotted against maximum lifespan (years) of 96 **mammalian** species.

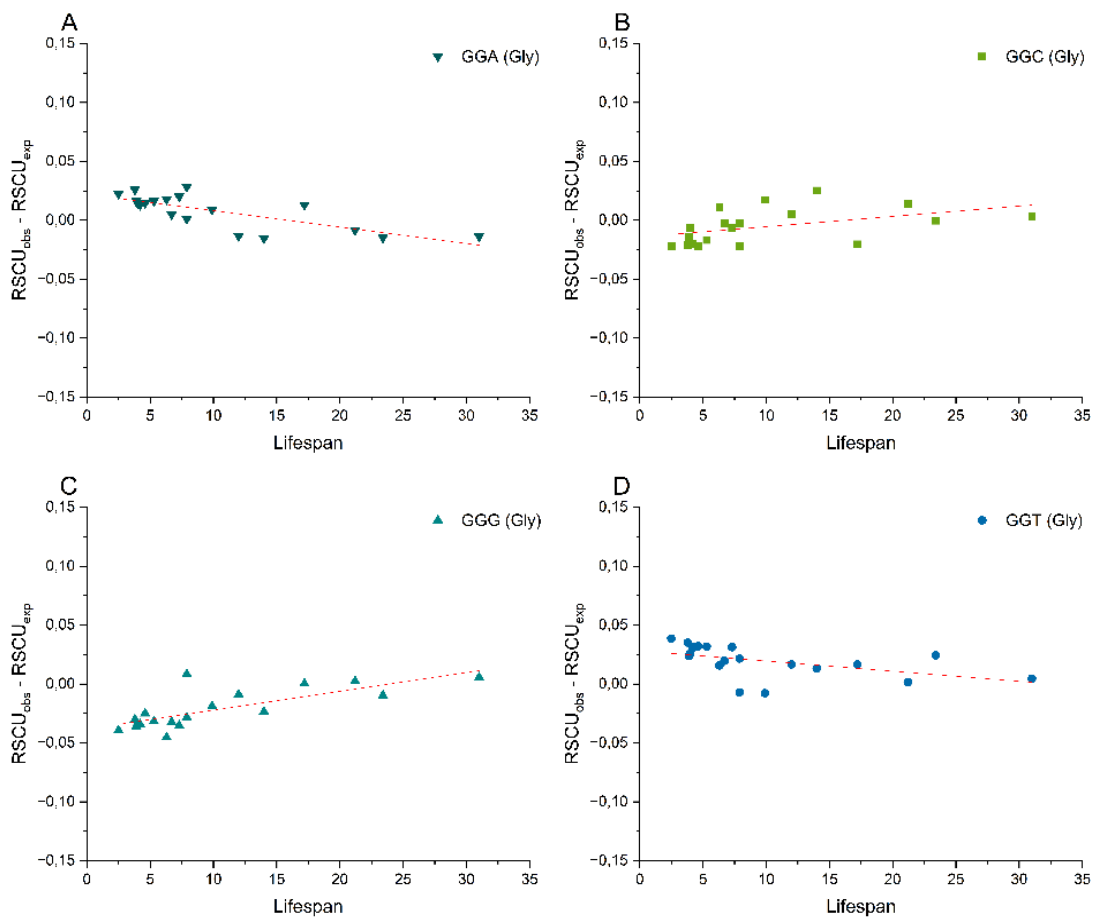

**Supplementary figure 8.a.** Differences between observed and expected relative synonymous codon usage (RSCU) values for codons encoding **glycine**, plotted against maximum lifespan (years) of 19 **rodent** species.

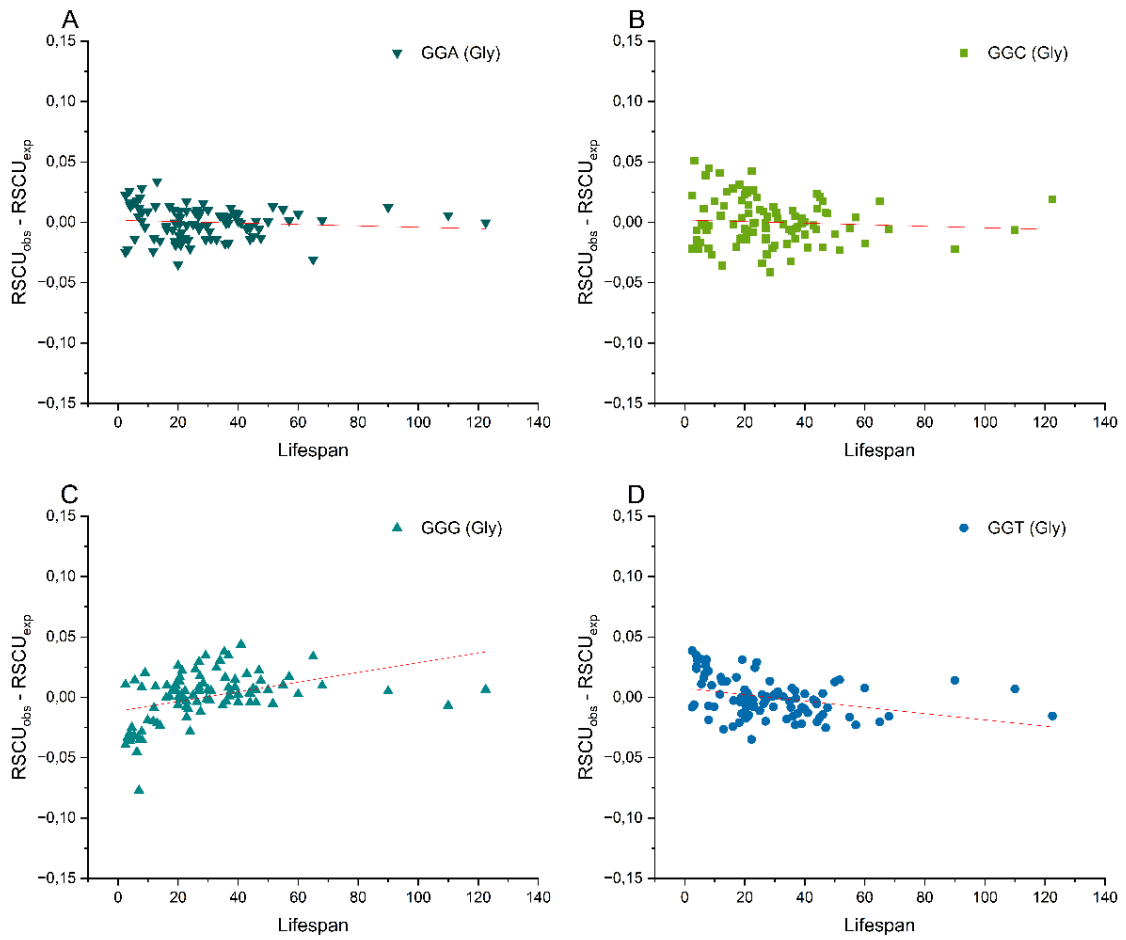

**Supplementary figure 8.b.** Differences between observed and expected relative synonymous codon usage (RSCU) values for codons encoding **glycine**, plotted against maximum lifespan (years) of 96 **mammalian** species.

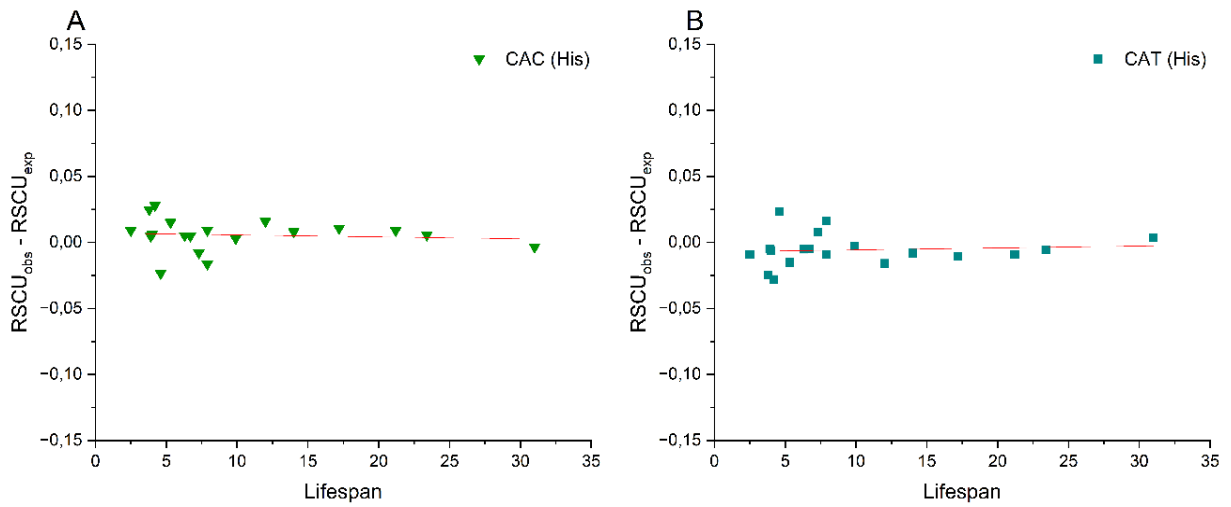

**Supplementary figure 9.a.** Differences between observed and expected relative synonymous codon usage (RSCU) values for codons encoding **histidine**, plotted against maximum lifespan (years) of 19 **rodent** species.

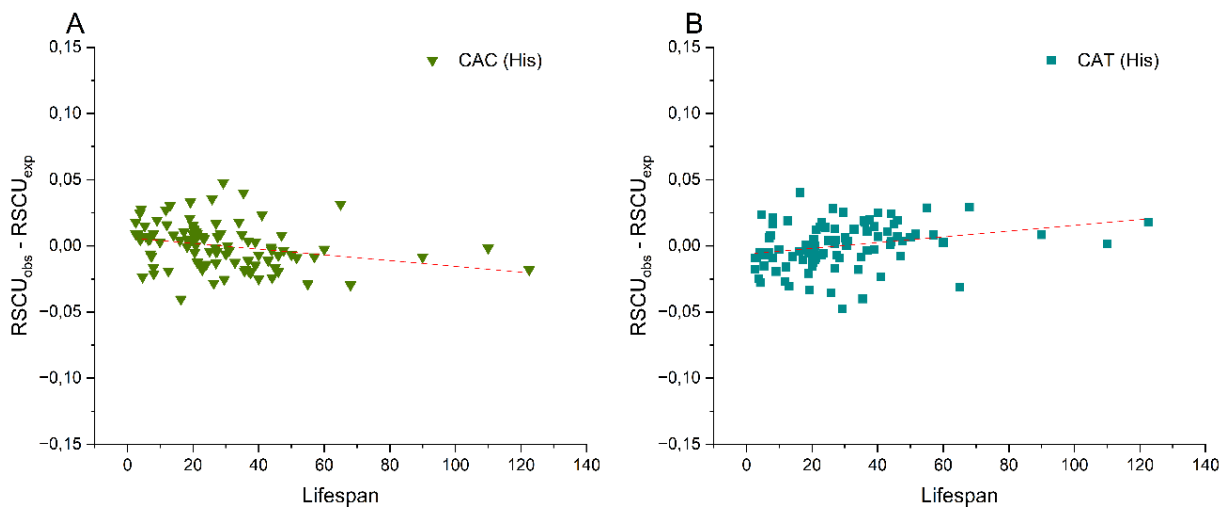

**Supplementary figure 9.b.** Differences between observed and expected relative synonymous codon usage (RSCU) values for codons encoding **histidine**, plotted against maximum lifespan (years) of 96 **mammalian** species.

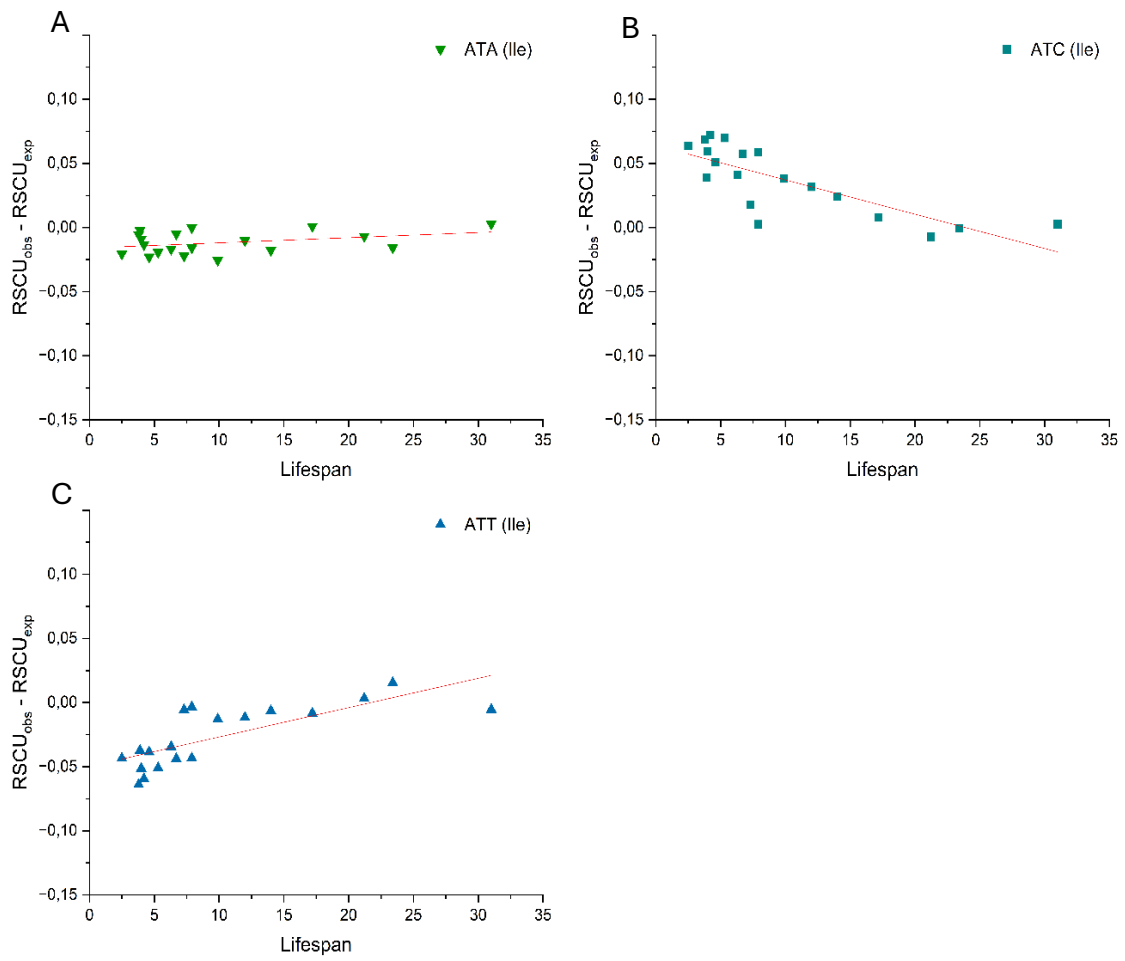

**Supplementary figure 10.a.** Differences between observed and expected relative synonymous codon usage (RSCU) values for codons encoding **isoleucine**, plotted against maximum lifespan (years) of 19 **rodent** species.

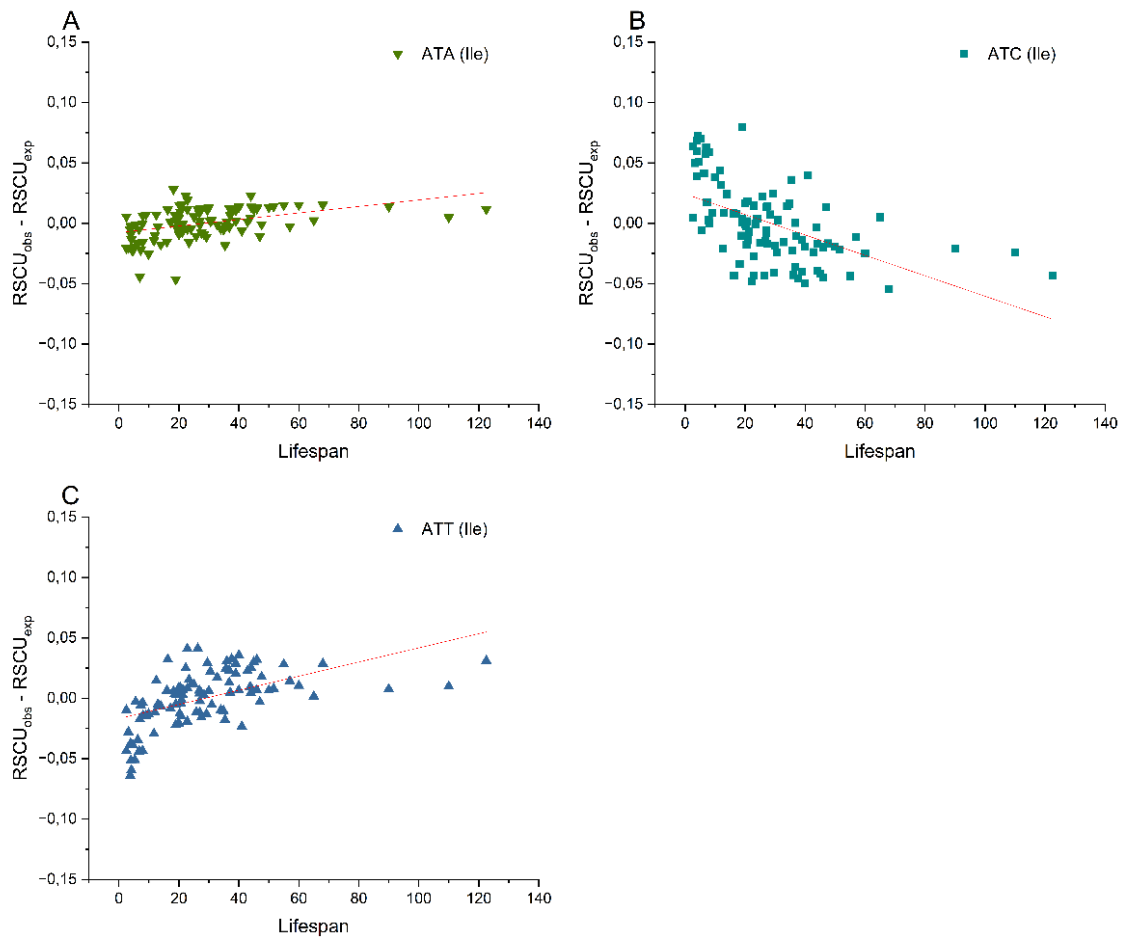

**Supplementary figure 10.b.** Differences between observed and expected relative synonymous codon usage (RSCU) values for codons encoding **isoleucine**, plotted against maximum lifespan (years) of 96 **mammalian** species.

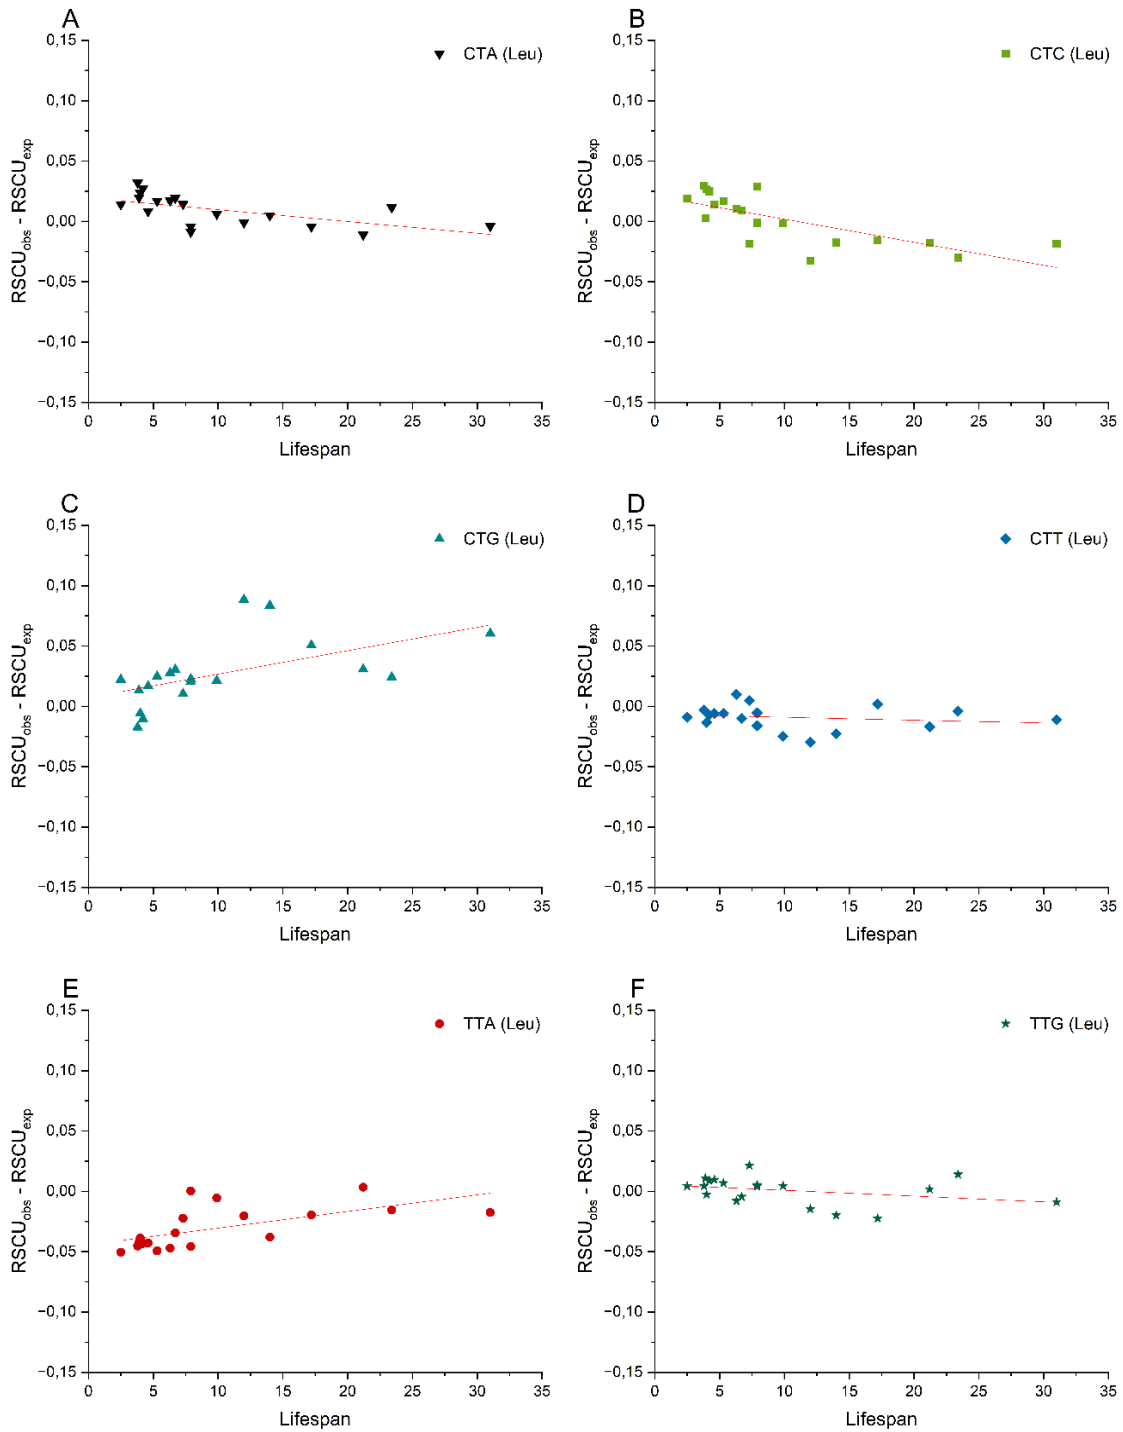

**Supplementary figure 11.a.** Differences between observed and expected relative synonymous codon usage (RSCU) values for codons encoding **leucine**, plotted against maximum lifespan (years) of 19 **rodent** species.

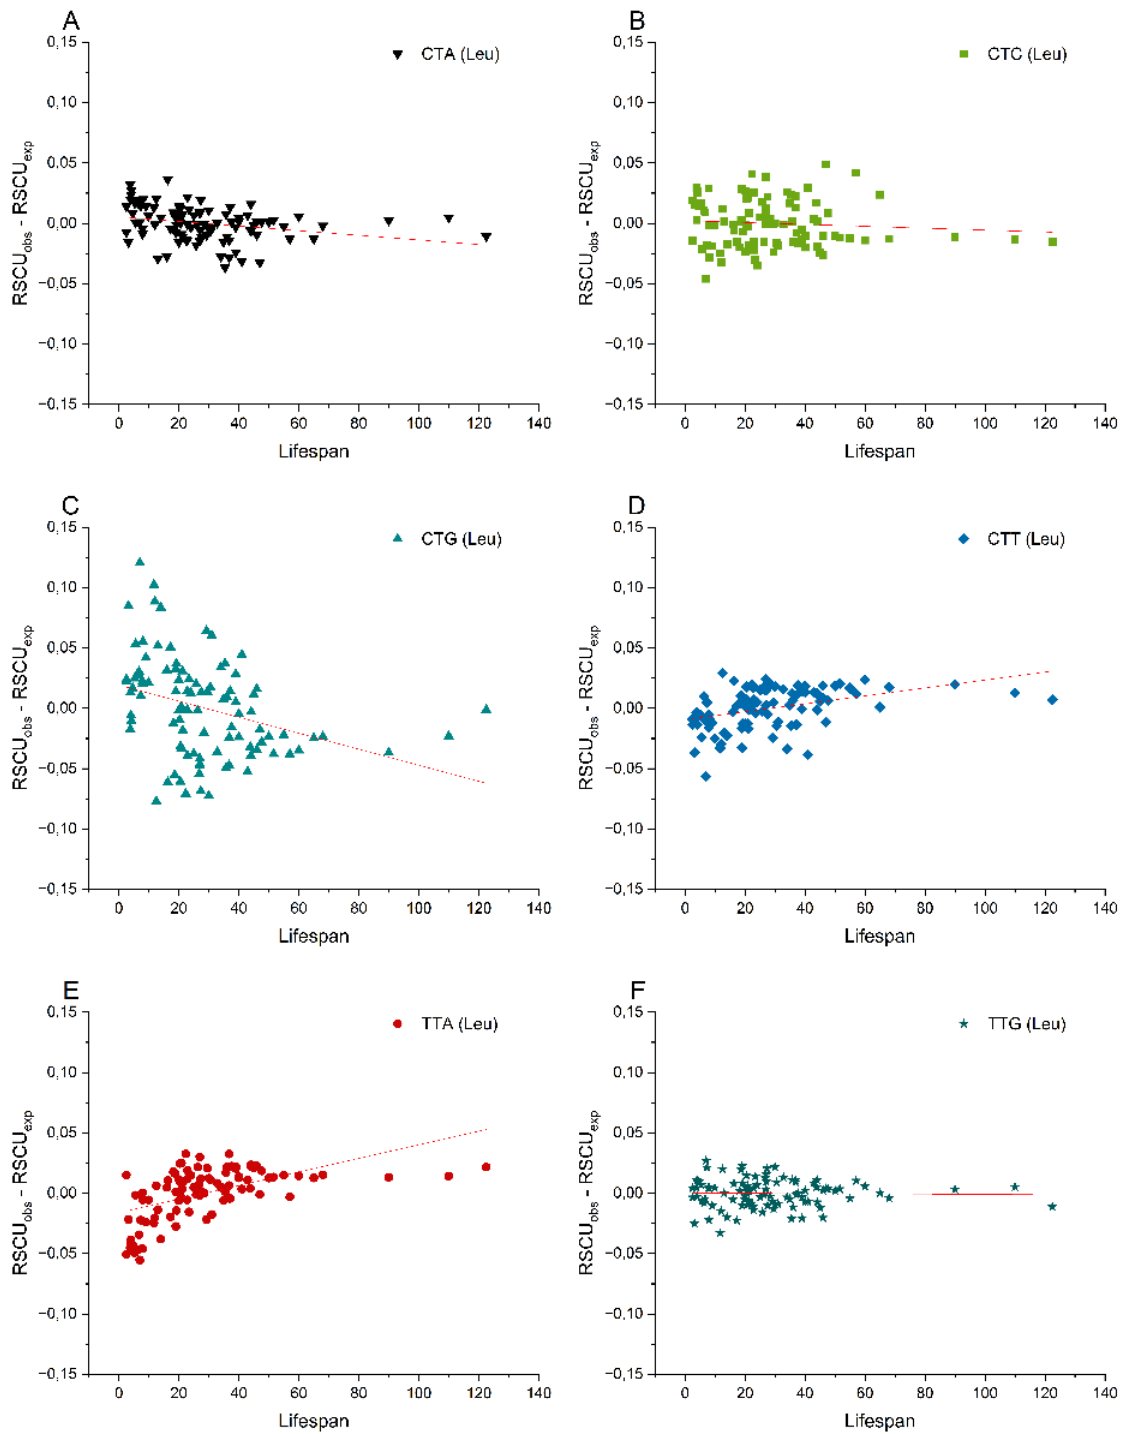

**Supplementary figure 11.b.** Differences between observed and expected relative synonymous codon usage (RSCU) values for codons encoding **leucine**, plotted against maximum lifespan (years) of 96 **mammalian** species.

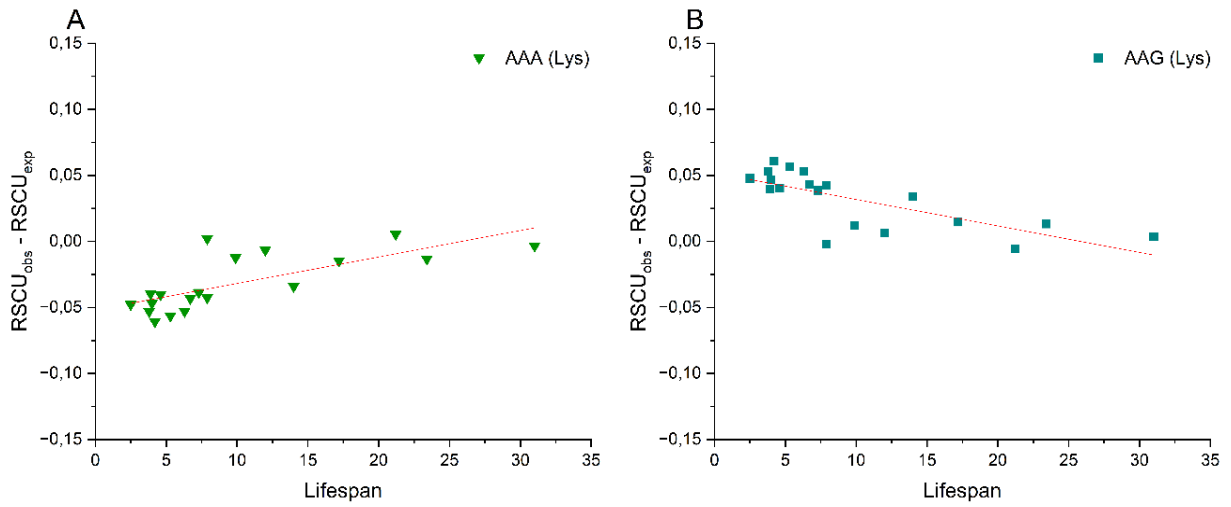

**Supplementary figure 12.a.** Differences between observed and expected relative synonymous codon usage (RSCU) values for codons encoding **lysine**, plotted against maximum lifespan (years) of 19 **rodent** species.

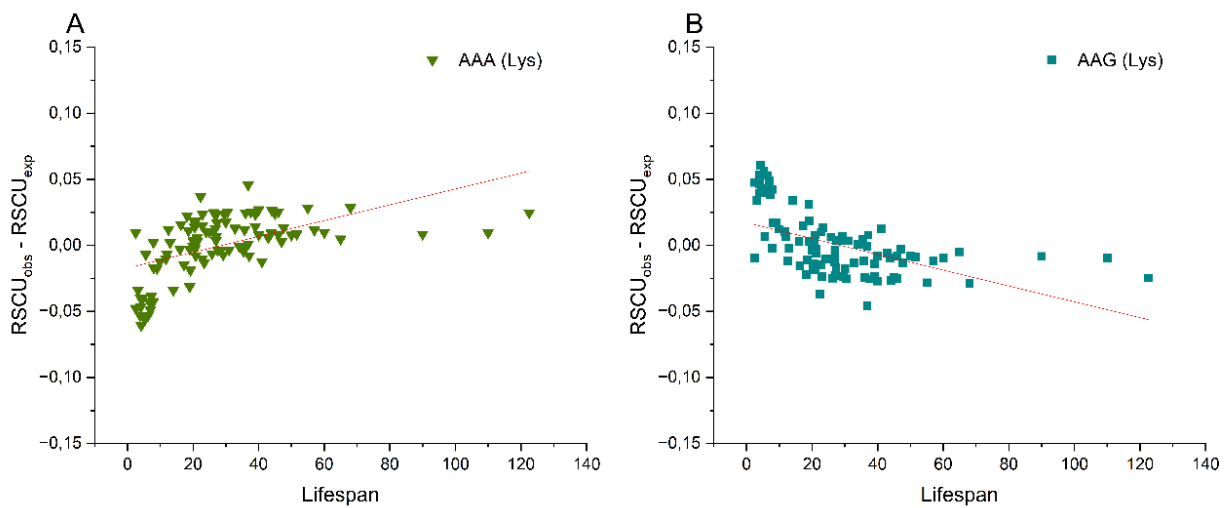

**Supplementary figure 12.b.** Differences between observed and expected relative synonymous codon usage (RSCU) values for codons encoding **lysine**, plotted against maximum lifespan (years) of 96 **mammalian** species.

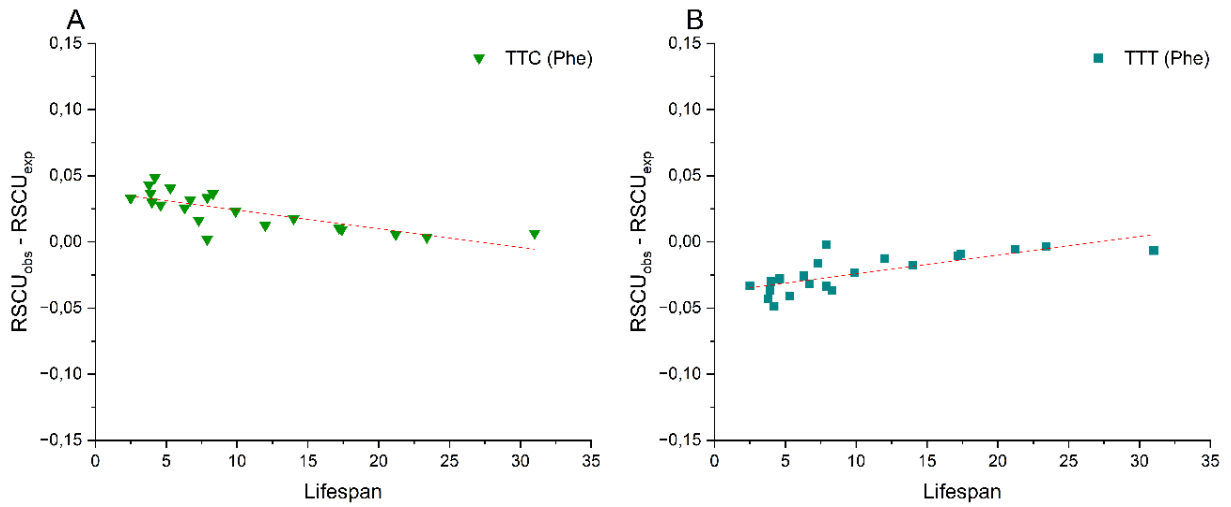

**Supplementary figure 13.a.** Differences between observed and expected relative synonymous codon usage (RSCU) values for codons encoding **phenylalanine**, plotted against maximum lifespan (years) of 19 **rodent** species.

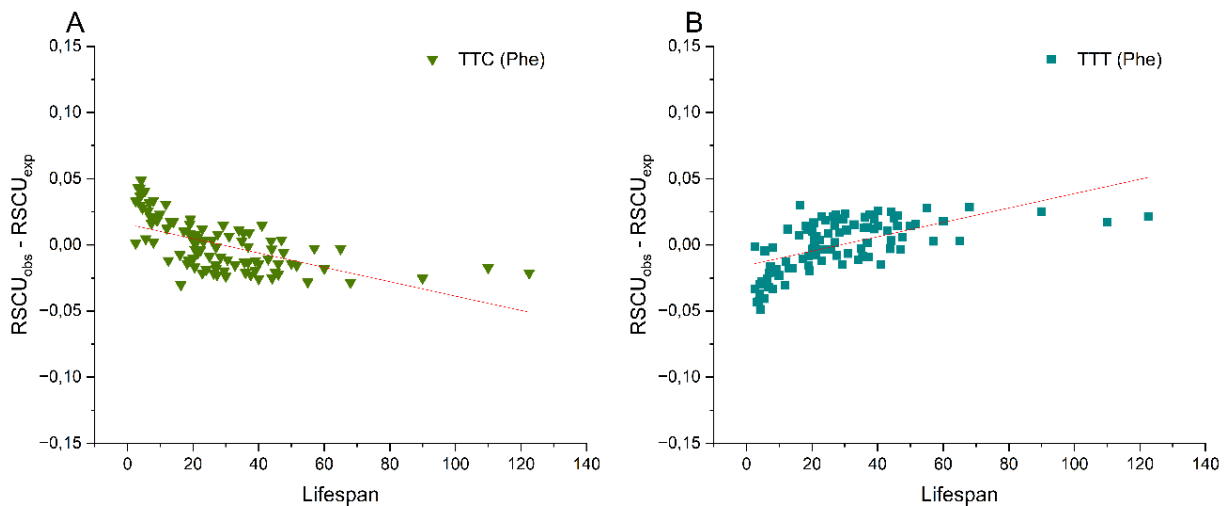

**Supplementary figure 13.b.** Differences between observed and expected relative synonymous codon usage (RSCU) values for codons encoding **phenylalanine**, plotted against maximum lifespan (years) of 96 **mammalian** species.

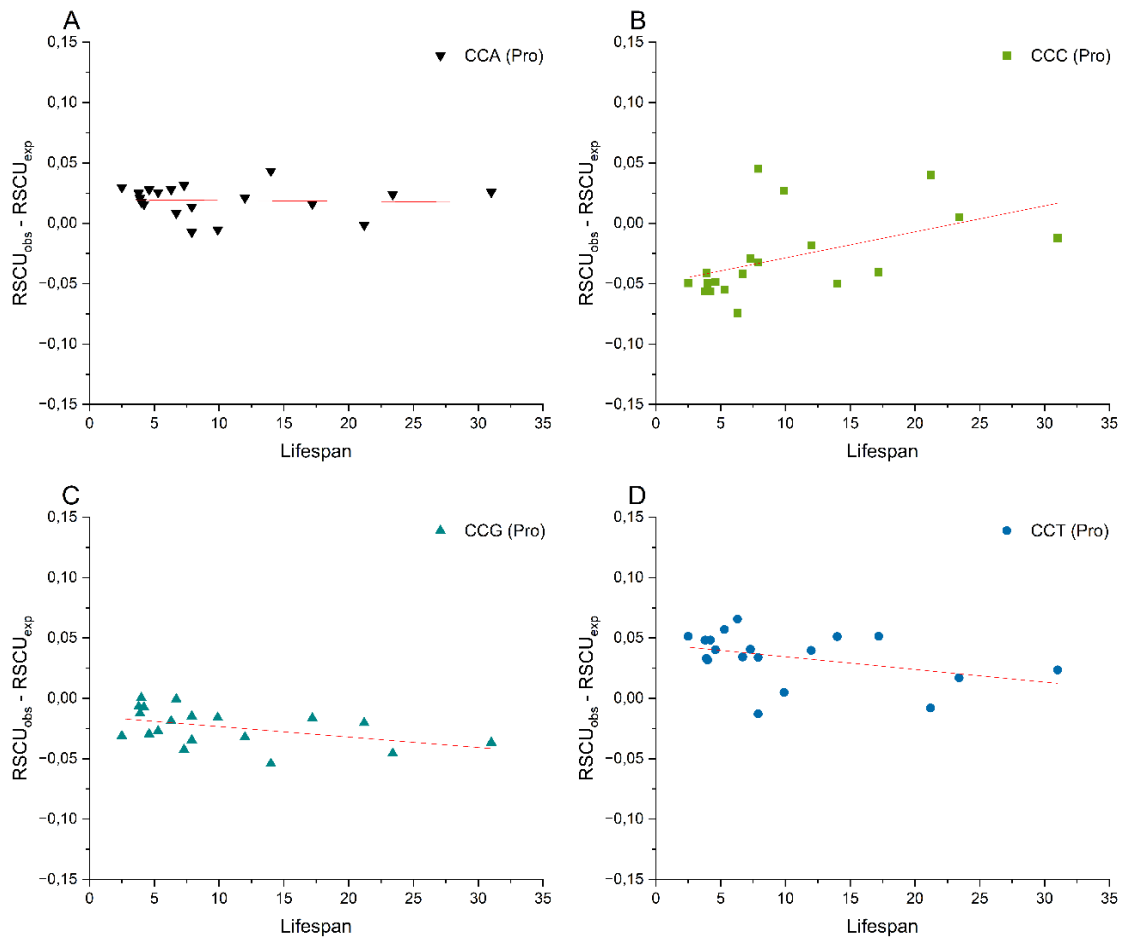

**Supplementary figure 14.a.** Differences between observed and expected relative synonymous codon usage (RSCU) values for codons encoding **proline**, plotted against maximum lifespan (years) of 19 **rodent** species.

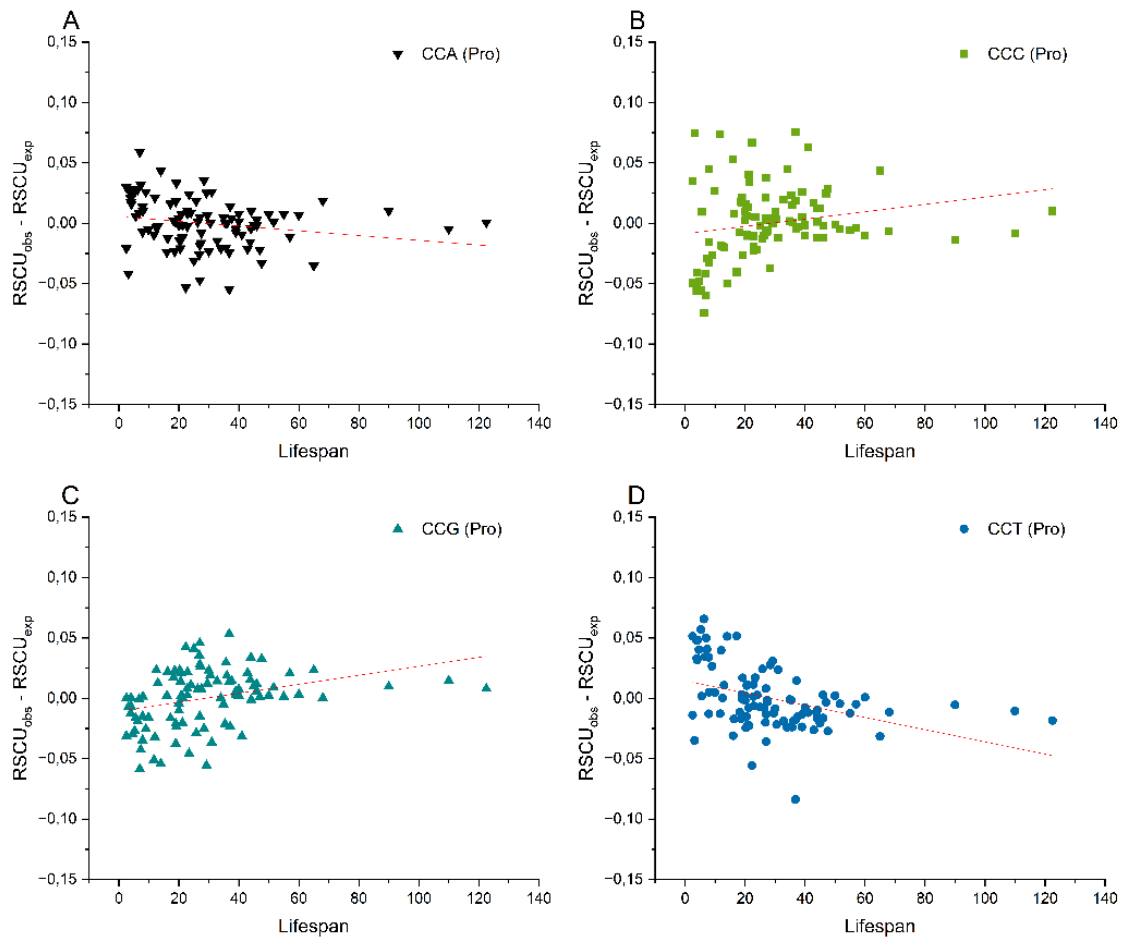

**Supplementary figure 14.b.** Differences between observed and expected relative synonymous codon usage (RSCU) values for codons encoding **proline**, plotted against maximum lifespan (years) of 96 **mammalian** species.

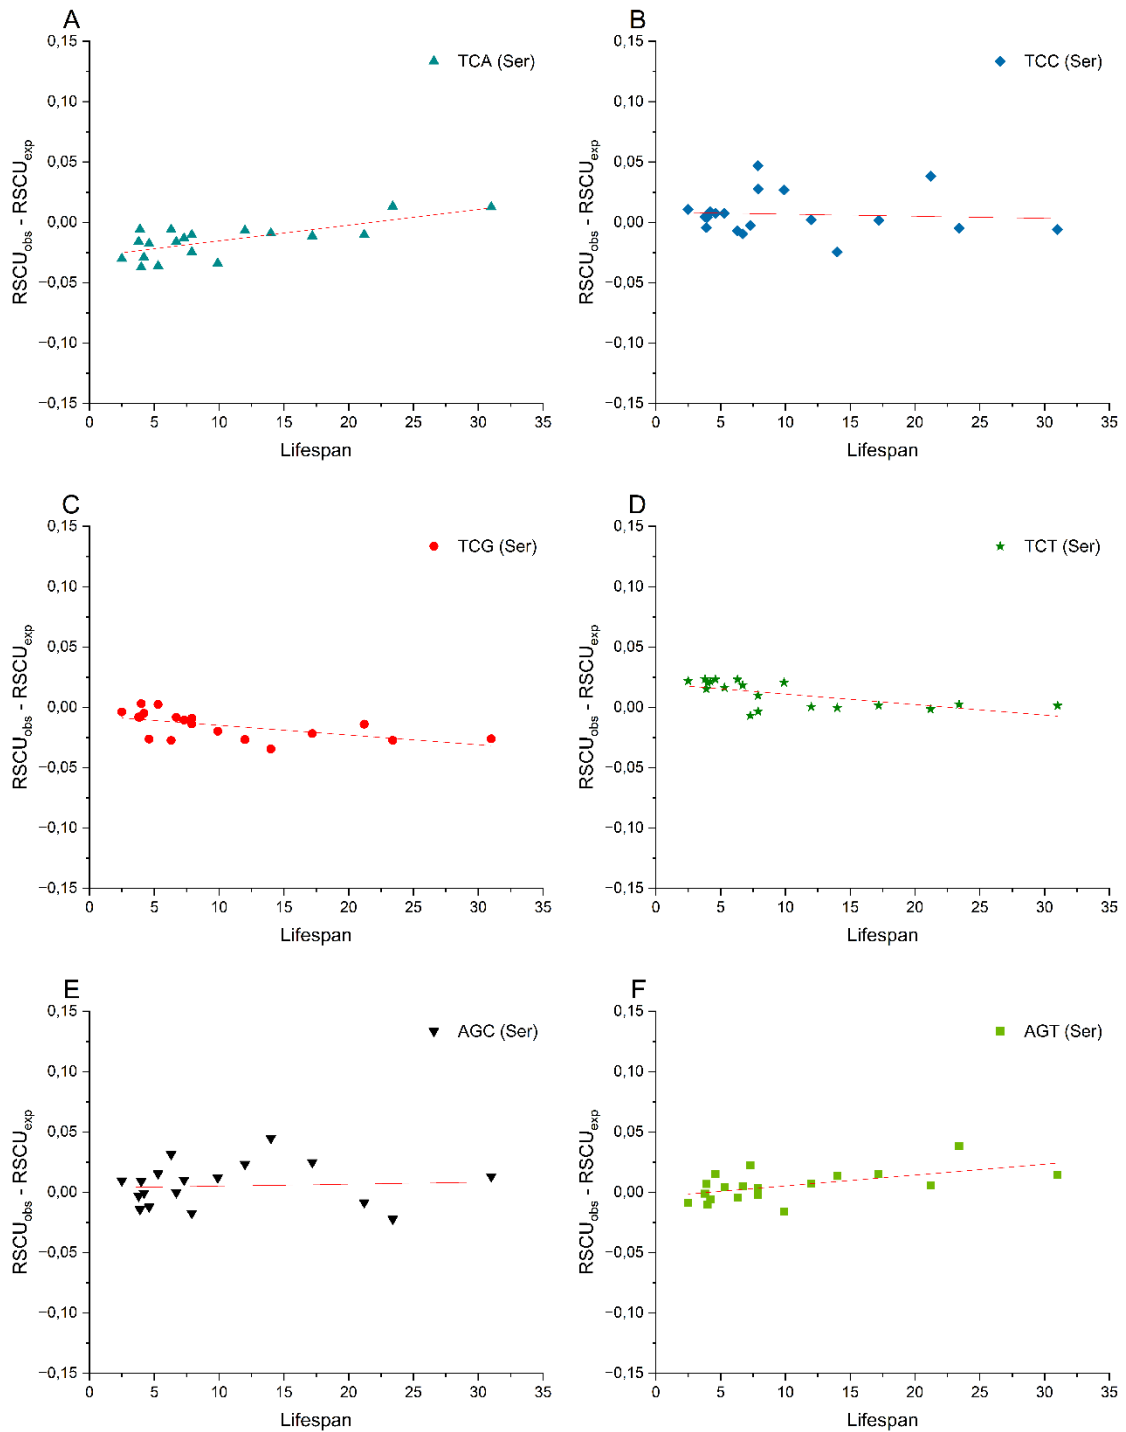

**Supplementary figure 15.a.** Differences between observed and expected relative synonymous codon usage (RSCU) values for codons encoding **serine**, plotted against maximum lifespan (years) of 19 **rodent** species.

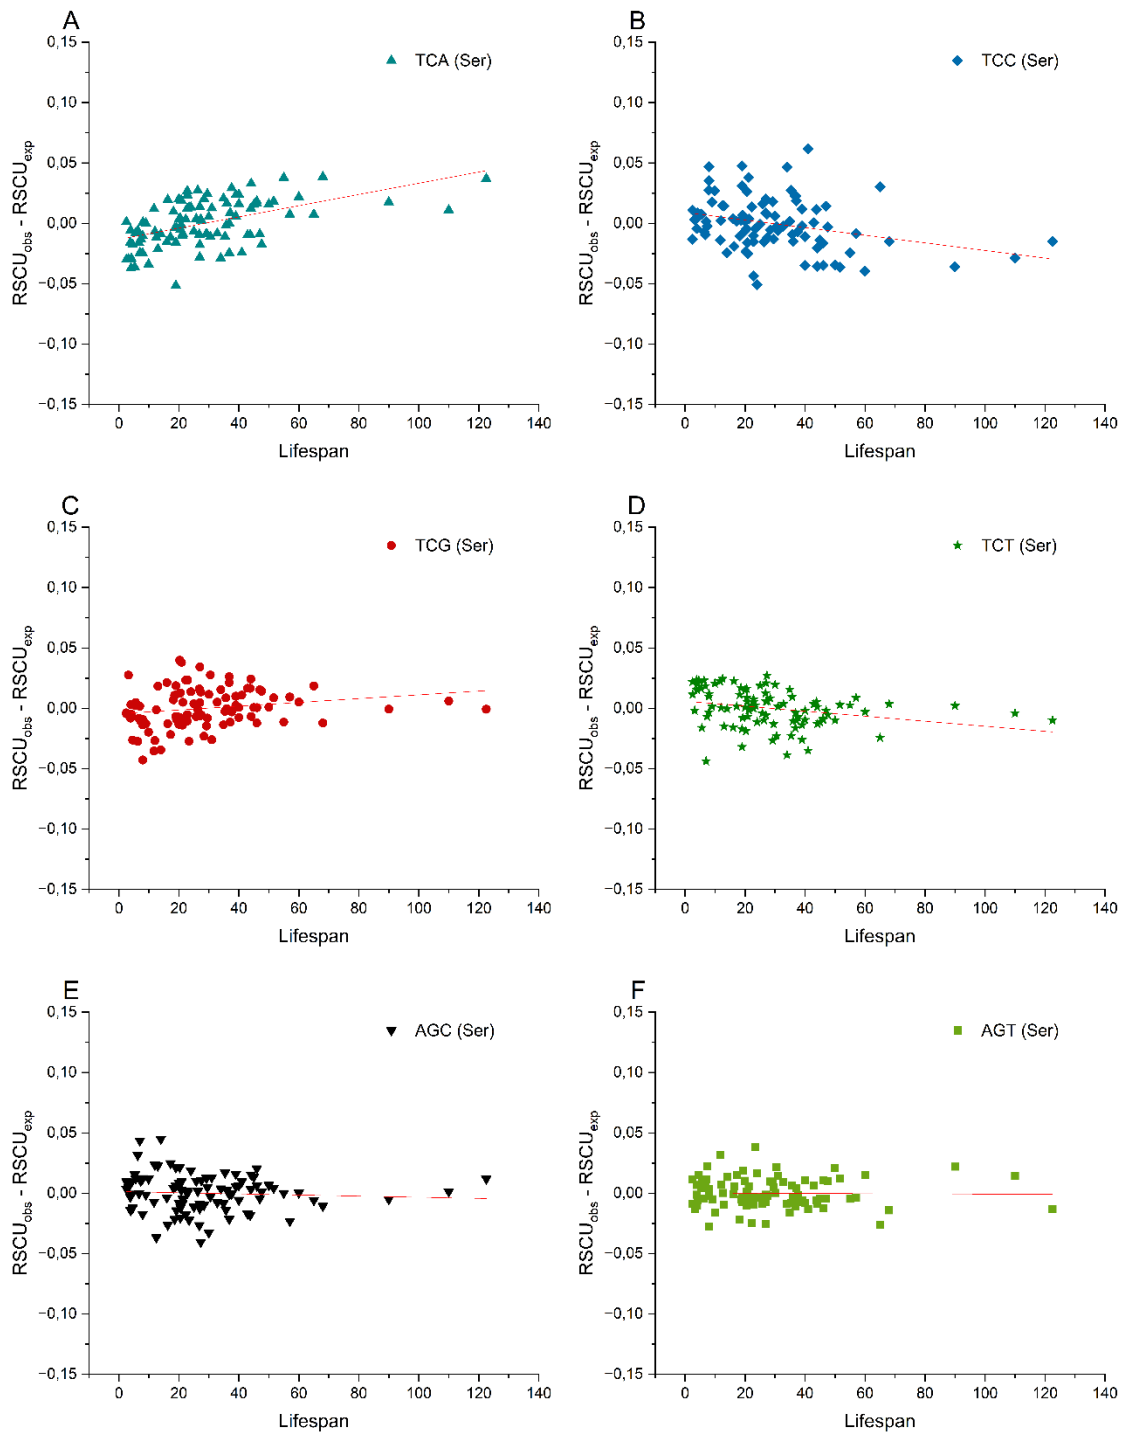

**Supplementary figure 15.b.** Differences between observed and expected relative synonymous codon usage (RSCU) values for codons encoding **serine**, plotted against maximum lifespan (years) of 96 **mammalian** species.

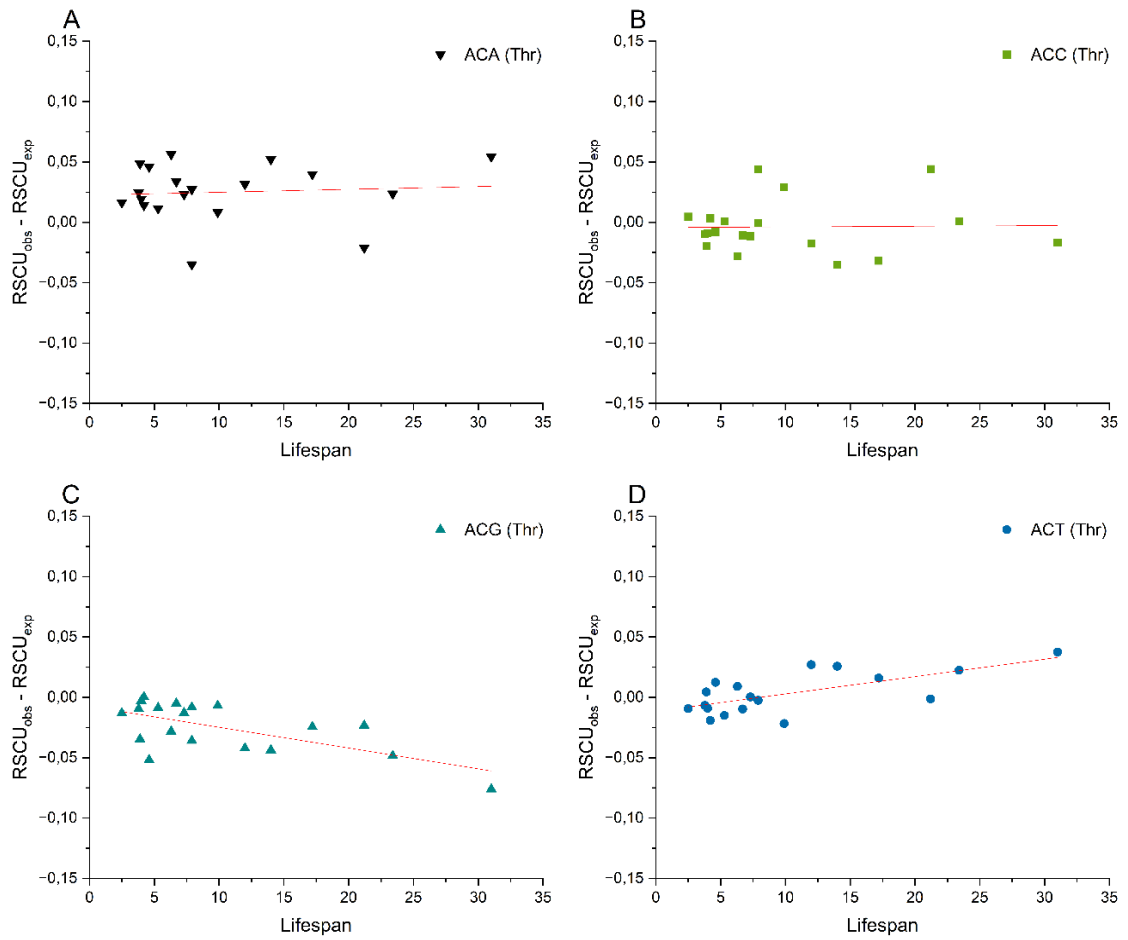

**Supplementary figure 16.a.** Differences between observed and expected relative synonymous codon usage (RSCU) values for codons encoding **threonine**, plotted against maximum lifespan (years) of 19 **rodent** species.

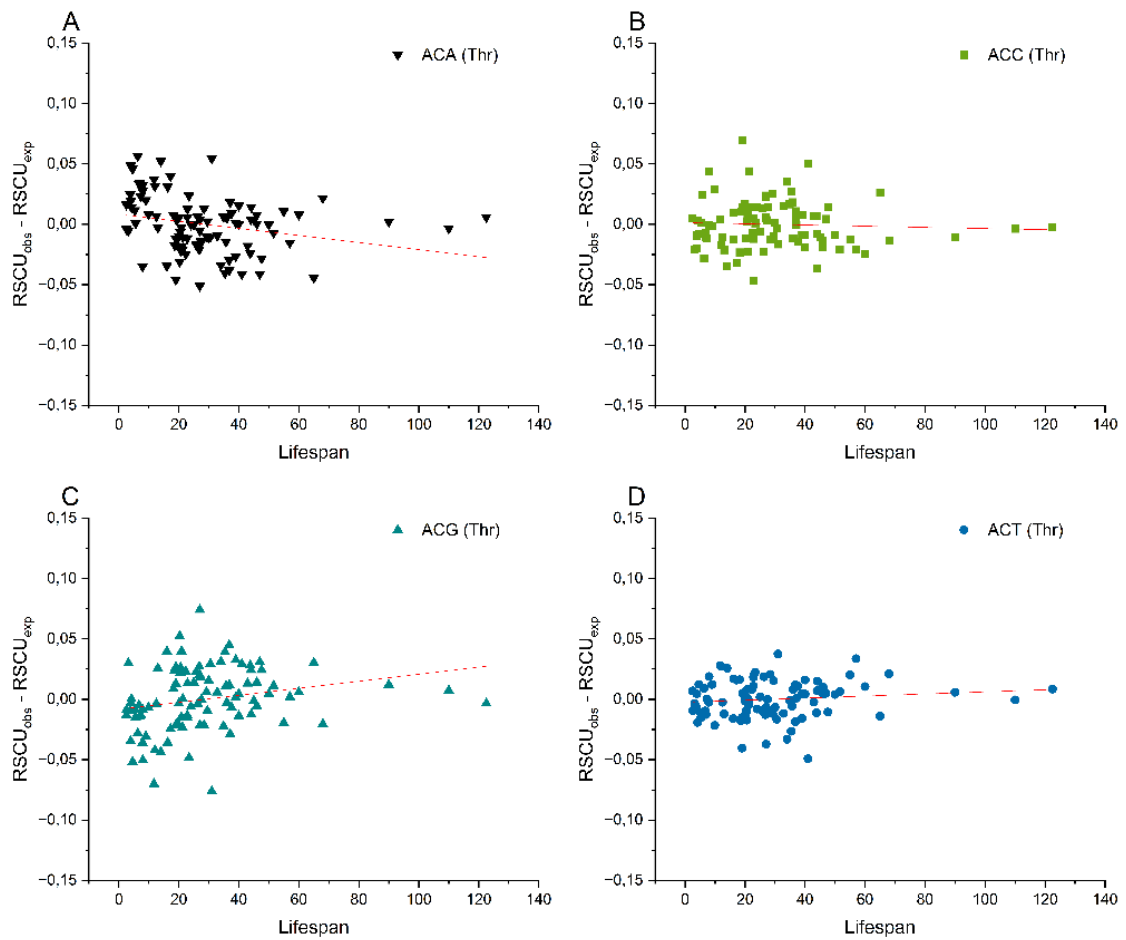

**Supplementary figure 16.b.** Differences between observed and expected relative synonymous codon usage (RSCU) values for codons encoding **threonine**, plotted against maximum lifespan (years) of 96 **mammalian** species.

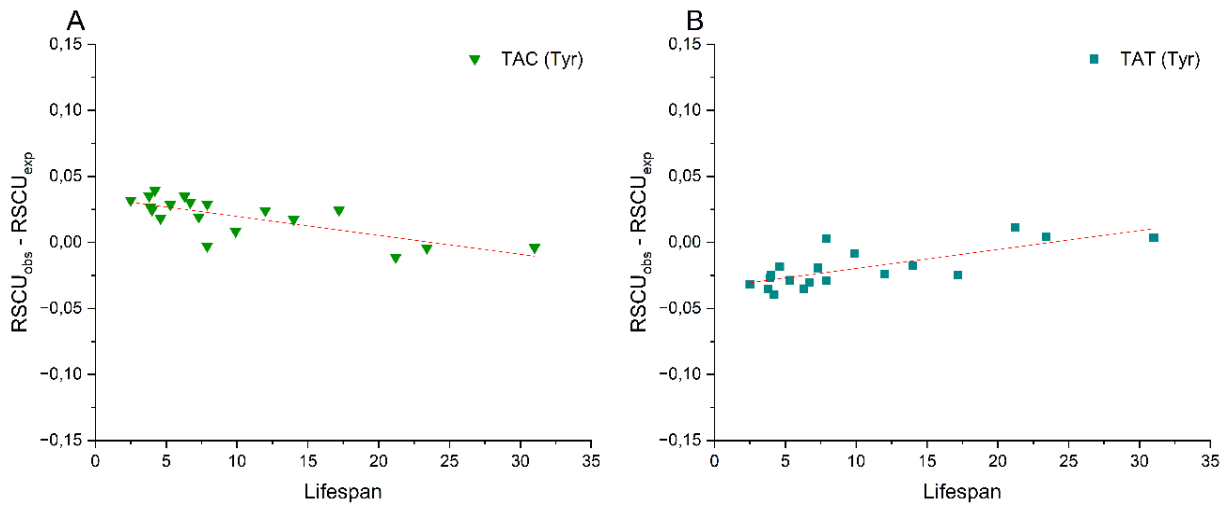

**Supplementary figure 17.a.** Differences between observed and expected relative synonymous codon usage (RSCU) values for codons encoding **tyrosine**, plotted against maximum lifespan (years) of 19 **rodent** species.

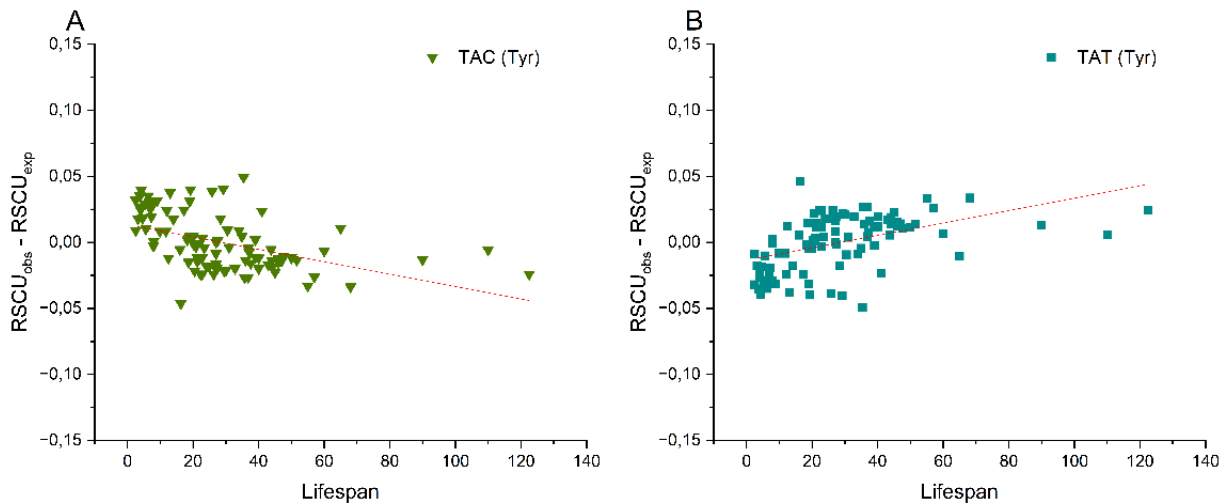

**Supplementary figure 17.b.** Differences between observed and expected relative synonymous codon usage (RSCU) values for codons encoding **tyrosine**, plotted against maximum lifespan (years) of 96 **mammalian** species.

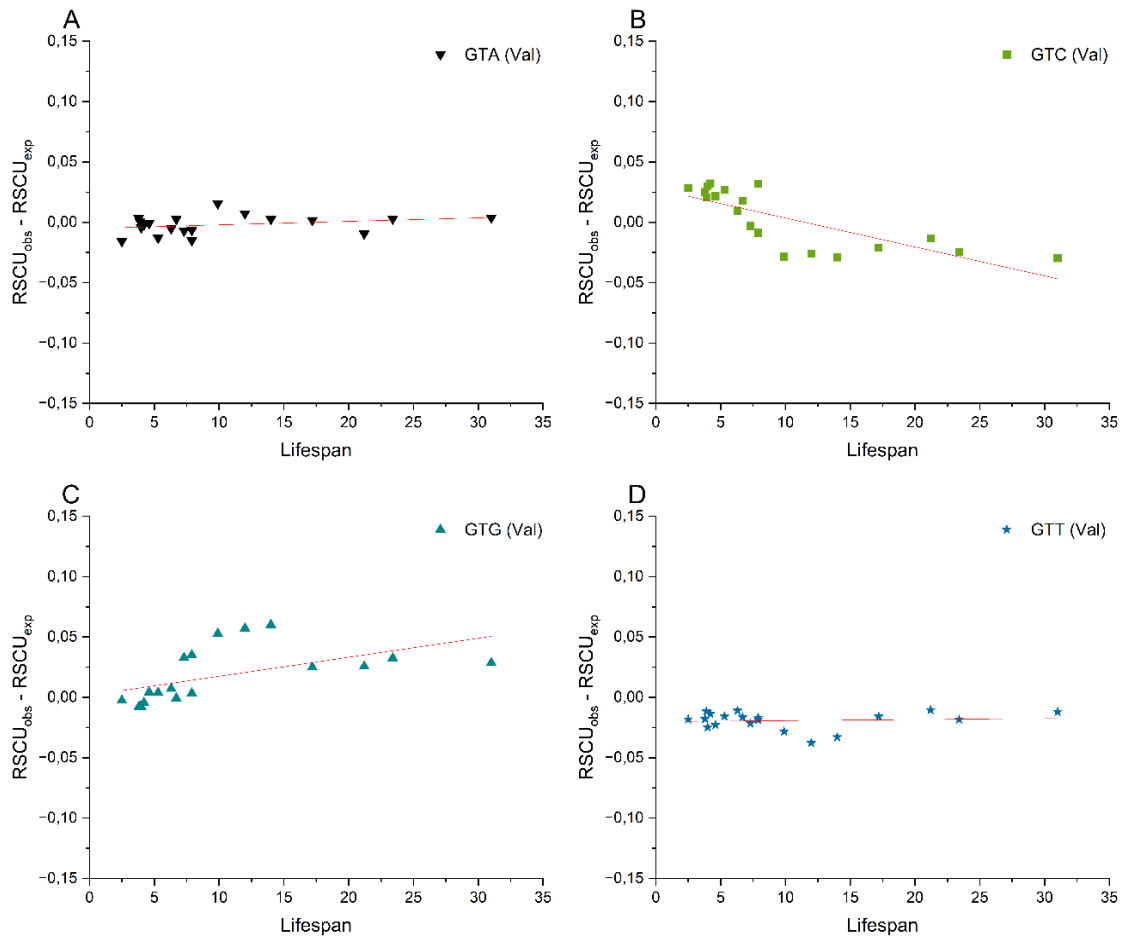

**Supplementary figure 18.a.** Differences between observed and expected relative synonymous codon usage (RSCU) values for codons encoding **valine**, plotted against maximum lifespan (years) of 19 **rodent** species.

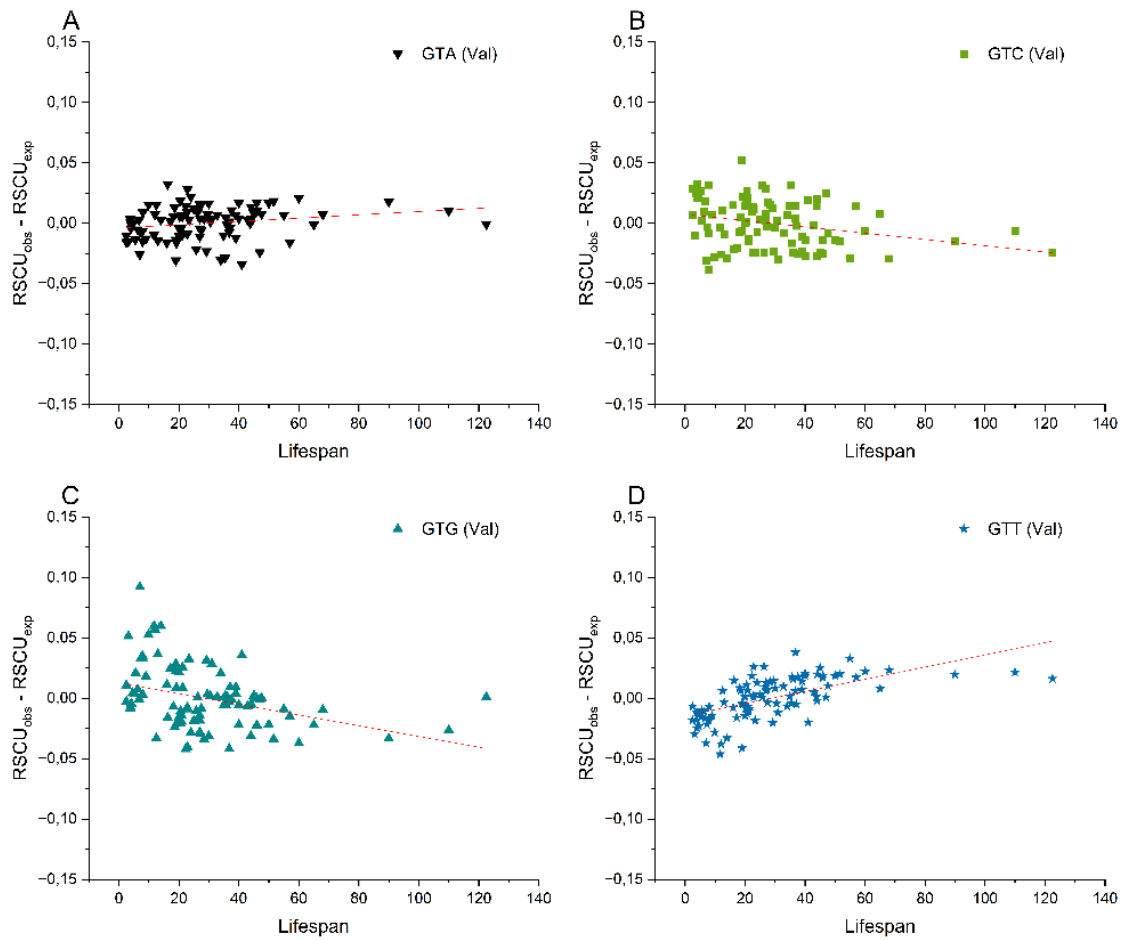

**Supplementary figure 18.b.** Differences between observed and expected relative synonymous codon usage (RSCU) values for codons encoding **valine**, plotted against maximum lifespan (years) of 96 **mammalian** species.

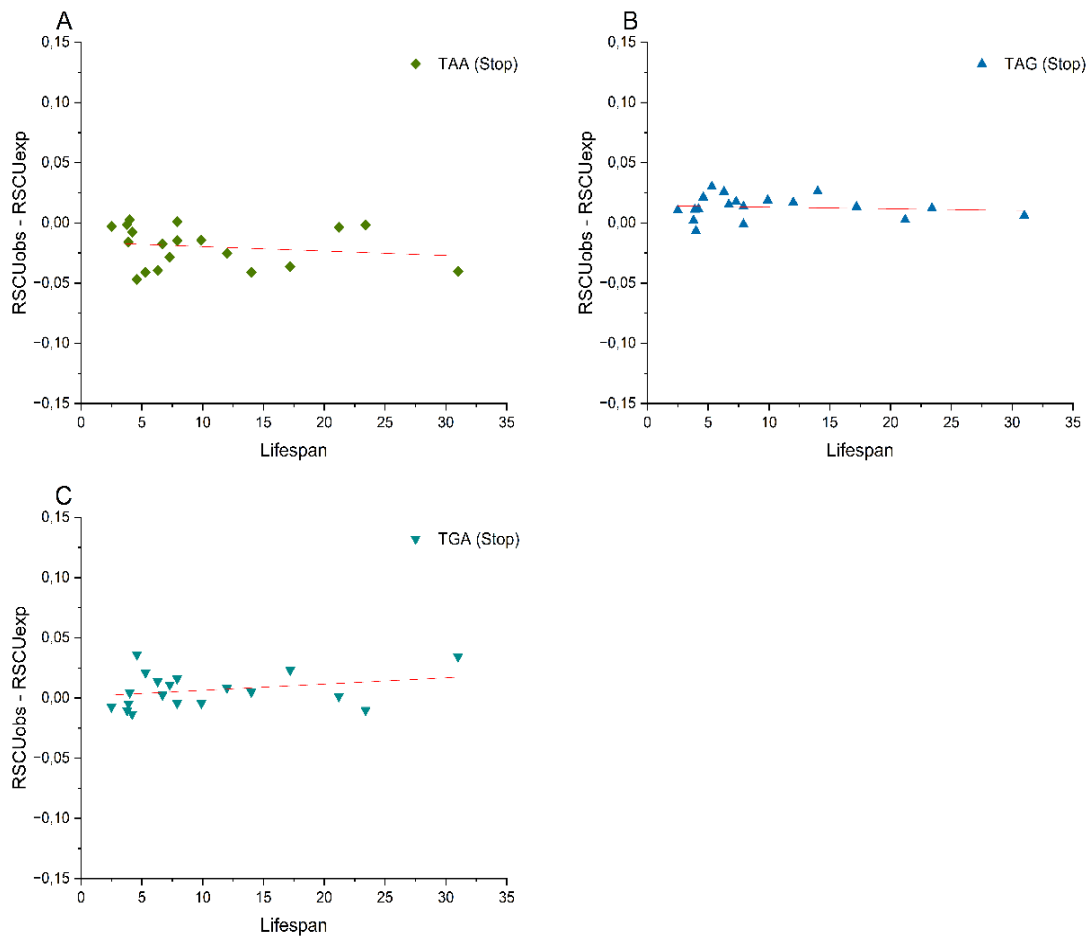

**Supplementary figure 19.a.** Differences between observed and expected relative synonymous codon usage (RSCU) values for **stop** codons, plotted against maximum lifespan (years) of 19 **rodent** species.

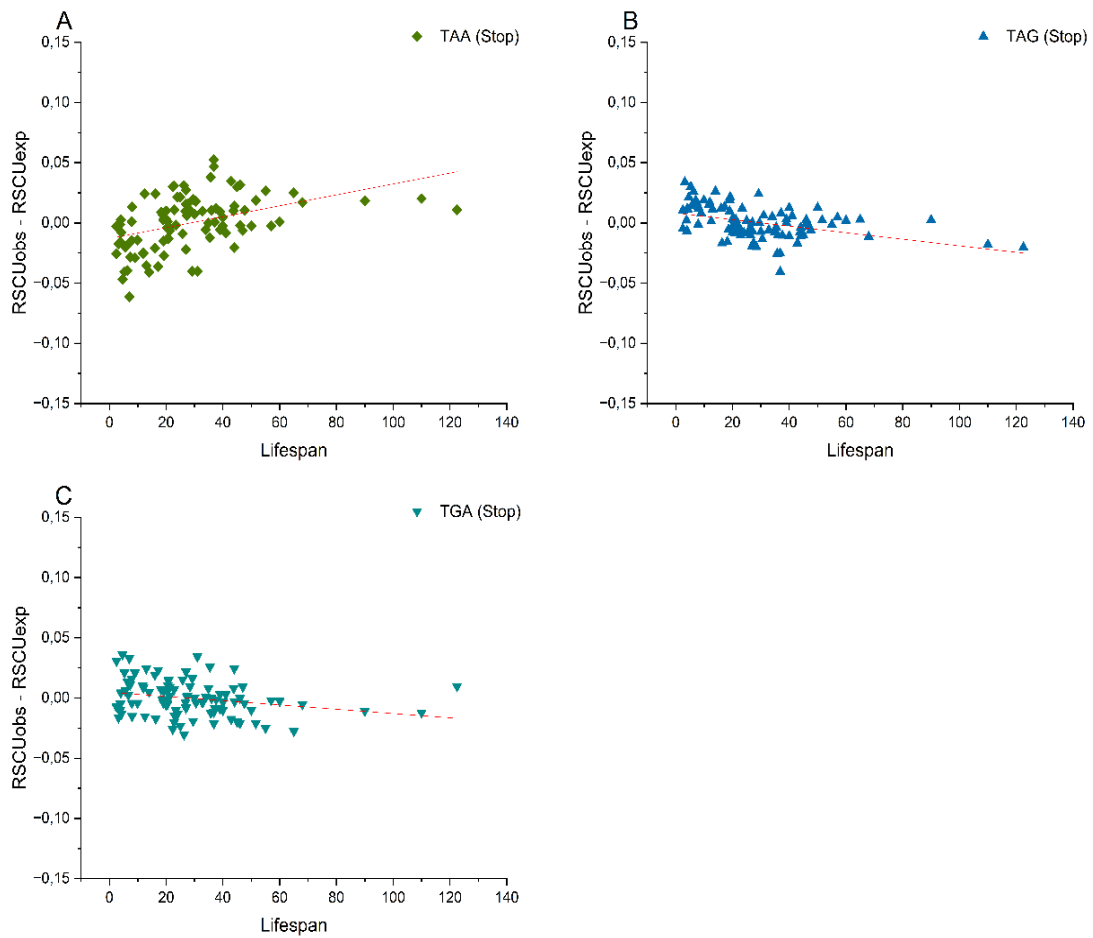

**Supplementary figure 19.b.** Differences between observed and expected relative synonymous codon usage (RSCU) values for **stop** codons, plotted against maximum lifespan (years) of 96 **mammalian** species.

# Copy number of tRNA genes in metazoa and impact of GC content of coding genomes and lifespan on relative synonymous codon usage (RSCU) of mammalian species

Note: Data for synonymous codons with the highest and lowest numbers of matching isodecoder tRNA genes in green and red, respectively

| Codon | RSCU <sub>met</sub> | Copy number of tRNA genes in metazoa |                  |                 |                                           |                               | Copy number of tRNA genes in mammals |                  |                 |                                           |                               | Copy number of tRNA genes in mammalian species analyzed in this study |                  |                 |                                           |                               | Impact of GC content of coding genomes on codon usage (RSCU) of mammalian species |       |                            |             |                | Correlation between changes in codon usage and lifespan in rodent species |                                  |                                 |       |                            | Correlation between changes in codon usage and lifespan in mammalian species |                |             |                                  |                                 |       |                            |             |                |             |                                  |
|-------|---------------------|--------------------------------------|------------------|-----------------|-------------------------------------------|-------------------------------|--------------------------------------|------------------|-----------------|-------------------------------------------|-------------------------------|-----------------------------------------------------------------------|------------------|-----------------|-------------------------------------------|-------------------------------|-----------------------------------------------------------------------------------|-------|----------------------------|-------------|----------------|---------------------------------------------------------------------------|----------------------------------|---------------------------------|-------|----------------------------|------------------------------------------------------------------------------|----------------|-------------|----------------------------------|---------------------------------|-------|----------------------------|-------------|----------------|-------------|----------------------------------|
|       |                     | Amino acid                           | Anticodon (tRNA) | Anticodon (RNA) | Fraction of species lacking the tRNA gene | Mean of tRNA gene copy number | Median of tRNA gene copy number      | Anticodon (tRNA) | Anticodon (RNA) | Fraction of species lacking the tRNA gene | Mean of tRNA gene copy number | Median of tRNA gene copy number                                       | Anticodon (tRNA) | Anticodon (RNA) | Fraction of species lacking the tRNA gene | Mean of tRNA gene copy number | Median of tRNA gene copy number                                                   | Codon | Number of points (species) | Pearson's r | R-Square (COD) | Slope value                                                               | Standard error of slope analysis | Adj. R-square of slope analysis | Codon | Number of points (species) | Pearson's r                                                                  | R-Square (COD) | Slope value | Standard error of slope analysis | Adj. R-square of slope analysis | Codon | Number of points (species) | Pearson's r | R-Square (COD) | Slope value | Standard error of slope analysis |
| Ala   | 1.071               | Alanine                              | UGC              | GCA             | 0                                         | 13.32                         | UGC                                  | GCA              | 0               | 13.62                                     | 9                             | UGC                                                                   | GCA              | 0               | 16.30                                     | 9                             | GCA (Ala)                                                                         | 96    | -0.9540                    | 0.9101      | -6.7442        | 0.2196                                                                    | 0.9092                           | GCA (Ala)                       | 19    | 0.4012                     | 0.1610                                                                       | 0.0010         | 0.0006      | 0.1116                           | GCA (Ala)                       | 96    | -0.4460                    | 0.0021      | 0.0000         | 0.0001      | -0.0085                          |
| Ala   | 1.401               | Alanine                              | GCC              | GCC             | 0.794                                     | 2.77                          | GCC                                  | GCC              | 0.759           | 3.34                                      | 0                             | GCC                                                                   | GCC              | 0.727           | 5.70                                      | 0                             | GCC (Ala)                                                                         | 96    | 0.9165                     | 0.8399      | 7.9626         | 0.3405                                                                    | 0.8382                           | GCC (Ala)                       | 19    | 0.2447                     | 0.0599                                                                       | 0.0010         | 0.0010      | 0.0046                           | GCC (Ala)                       | 96    | 0.2187                     | 0.0478      | 0.0003         | 0.0001      | 0.0377                           |
| GCG   | 0.267               | Alanine                              | CGC              | GCG             | 0                                         | 7.45                          | GCG                                  | GCG              | 0               | 7.24                                      | 5                             | GCG                                                                   | GCG              | 0               | 8.64                                      | 5                             | GCG (Ala)                                                                         | 96    | 0.9249                     | 0.8555      | 6.8735         | 0.2914                                                                    | 0.8540                           | GCG (Ala)                       | 19    | -0.1078                    | 0.0116                                                                       | -0.0001        | 0.0002      | -0.0465                          | GCG (Ala)                       | 96    | 0.2218                     | 0.0492      | 0.0002         | 0.0001      | 0.0391                           |
| GCT   | 1.261               | Alanine                              | AGC              | GCU             | 0                                         | 19.49                         | AGC                                  | GCU              | 0               | 20.10                                     | 15                            | AGC                                                                   | GCU              | 0               | 23.67                                     | 16                            | GCT (Ala)                                                                         | 96    | -0.9187                    | 0.8440      | -7.6837        | 0.3947                                                                    | 0.8424                           | GCT (Ala)                       | 19    | -0.6105                    | 0.3727                                                                       | -0.0020        | 0.0006      | 0.3358                           | GCT (Ala)                       | 96    | -0.3779                    | 0.1428      | -0.0005        | 0.0001      | 0.1337                           |
| Arg   | 1.475               | Arginine                             | UCU              | AGA             | 0                                         | 10.51                         | UCU                                  | AGA              | 0               | 8.60                                      | 6                             | UCU                                                                   | AGA              | 0               | 8.06                                      | 6                             | AGA (Arg)                                                                         | 96    | -0.9504                    | 0.9033      | -7.4449        | 0.2513                                                                    | 0.9022                           | AGA (Arg)                       | 19    | -0.5877                    | 0.3454                                                                       | -0.0023        | 0.0008      | 0.3069                           | AGA (Arg)                       | 96    | 0.0183                     | 0.0003      | 0.0000         | 0.0001      | -0.0103                          |
| Arg   | 1.354               | Arginine                             | CCU              | AGG             | 0                                         | 9.97                          | CCU                                  | AGG              | 0               | 8.76                                      | 7                             | CCU                                                                   | AGG              | 0               | 8.70                                      | 7                             | AGG (Arg)                                                                         | 96    | -0.9135                    | 0.8937      | -7.2483        | 0.3075                                                                    | 0.8558                           | AGG (Arg)                       | 19    | -0.3852                    | 0.1464                                                                       | -0.0014        | 0.0006      | 0.0983                           | AGG (Arg)                       | 96    | -0.1351                    | 0.0152      | -0.0002        | 0.0001      | 0.0076                           |
| CGA   | 0.734               | Arginine                             | UCG              | CGA             | 0                                         | 9.15                          | UCG                                  | CGA              | 0               | 6.84                                      | 5.5                           | UCG                                                                   | CGA              | 0               | 5.82                                      | 5                             | CGA (Arg)                                                                         | 96    | -0.8539                    | 0.8954      | -3.1243        | 0.2153                                                                    | 0.8921                           | CGA (Arg)                       | 19    | -0.6096                    | 0.3716                                                                       | -0.0013        | 0.0004      | 0.3347                           | CGA (Arg)                       | 96    | -0.4954                    | 0.1641      | -0.0003        | 0.0001      | 0.1552                           |
| CGC   | 0.895               | Arginine                             | GCC              | COC             | 0.928                                     | 0.19                          | GCC                                  | COC              | 0.828           | 0.36                                      | 0                             | GCC                                                                   | COC              | 0.758           | 0.52                                      | 0                             | CGC (Arg)                                                                         | 96    | 0.8586                     | 0.7372      | 7.4179         | 0.4568                                                                    | 0.7344                           | CGC (Arg)                       | 19    | 0.6438                     | 0.4145                                                                       | 0.0037         | 0.0011      | 0.3801                           | CGC (Arg)                       | 96    | 0.0396                     | 0.0016      | 0.0001         | 0.0002      | -0.0091                          |
| CGG   | 0.992               | Arginine                             | CCG              | CGG             | 0.354                                     | 2.55                          | CCG                                  | CGG              | 0               | 4.05                                      | 3.5                           | CCG                                                                   | CGG              | 0               | 3.67                                      | 3                             | CGG (Arg)                                                                         | 96    | 0.9270                     | 0.8893      | 8.2658         | 0.3449                                                                    | 0.8578                           | CGG (Arg)                       | 19    | 0.6151                     | 0.3783                                                                       | 0.0023         | 0.0007      | 0.3417                           | CGG (Arg)                       | 96    | 0.3681                     | 0.1355      | 0.0005         | 0.0001      | 0.1263                           |
| CGU   | 0.554               | Arginine                             | ACG              | CGU             | 0                                         | 12.01                         | ACG                                  | CGU              | 0               | 7.05                                      | 7                             | ACG                                                                   | CGU              | 0               | 6.79                                      | 6                             | CCT (Arg)                                                                         | 96    | -0.8524                    | 0.7266      | -2.9289        | 0.1853                                                                    | 0.7237                           | CCT (Arg)                       | 19    | -0.6007                    | 0.3608                                                                       | -0.0012        | 0.0004      | 0.3232                           | CCT (Arg)                       | 96    | -0.1258                    | 0.0158      | -0.0001        | 0.0001      | 0.0054                           |
| Asn   | 0.99                | Asparagine                           | GUU              | AAC             | 0                                         | 18.61                         | GUU                                  | AAC              | 0               | 15.48                                     | 15                            | GUU                                                                   | AAC              | 0               | 15.36                                     | 15                            | AAC (Asn)                                                                         | 96    | 0.7319                     | 0.5357      | 3.3086         | 0.3177                                                                    | 0.5338                           | AAC (Asn)                       | 19    | -0.7887                    | 0.6189                                                                       | -0.0032        | 0.0006      | 0.5984                           | AAC (Asn)                       | 96    | -0.4419                    | 0.1953      | -0.0005        | 0.0001      | 0.1867                           |
| Asn   | 1.01                | Asparagine                           | AUU              | AUU             | 0.785                                     | 0.65                          | AUU                                  | AUU              | 0.603           | 0.86                                      | 0                             | AUU                                                                   | AUU              | 0.576           | 1.03                                      | 0                             | AAT (Asn)                                                                         | 96    | -0.7319                    | 0.5357      | -3.3086        | 0.3177                                                                    | 0.5338                           | AAT (Asn)                       | 19    | 0.7887                     | 0.6189                                                                       | 0.0032         | 0.0006      | 0.5984                           | AAT (Asn)                       | 96    | 0.4419                     | 0.1953      | 0.0005         | 0.0001      | 0.1867                           |
| Asp   | 0.978               | Aspartic Acid                        | GUC              | GAC             | 0                                         | 20.25                         | GUC                                  | GAC              | 0               | 13.62                                     | 12                            | GUC                                                                   | GAC              | 0               | 13.39                                     | 12                            | GAC (Asp)                                                                         | 96    | 0.8756                     | 0.7667      | 4.2804         | 0.2706                                                                    | 0.7642                           | GAC (Asp)                       | 19    | -0.6639                    | 0.4407                                                                       | -0.0016        | 0.0004      | 0.4078                           | GAC (Asp)                       | 96    | -0.5123                    | 0.2625      | -0.0005        | 0.0001      | 0.2546                           |
| GAT   | 1.023               | Aspartic Acid                        | AUC              | GAU             | 0.897                                     | 0.68                          | AUC                                  | GAU              | 0.793           | 1.08                                      | 0                             | AUC                                                                   | GAU              | 0.848           | 3.12                                      | 0                             | GAT (Asp)                                                                         | 96    | -0.8756                    | 0.7667      | -4.2804        | 0.2436                                                                    | 0.7642                           | GAT (Asp)                       | 19    | 0.6639                     | 0.4407                                                                       | 0.0016         | 0.0004      | 0.4078                           | GAT (Asp)                       | 96    | 0.5123                     | 0.2625      | 0.0005         | 0.0001      | 0.2546                           |
| Cys   | 0.953               | Cysteine                             | AUC              | UGC             | 0                                         | 17.85                         | AUC                                  | UGC              | 0               | 25.71                                     | 22                            | AUC                                                                   | UGC              | 0               | 26.45                                     | 22                            | UGC (Cys)                                                                         | 96    | 0.9438                     | 0.8907      | 4.4568         | 0.1610                                                                    | 0.8895                           | UGC (Cys)                       | 19    | 0.5259                     | 0.2786                                                                       | 0.0010         | 0.0004      | 0.2340                           | UGC (Cys)                       | 96    | 0.1326                     | 0.0176      | 0.0001         | 0.0001      | 0.0071                           |
| TCU   | 1.047               | Cysteine                             | ACA              | UGU             | 0.789                                     | 0.49                          | ACA                                  | UGU              | 0.672           | 0.63                                      | 0                             | ACA                                                                   | UGU              | 0.636           | 0.52                                      | 0                             | TGU (Cys)                                                                         | 96    | -0.8438                    | 0.8907      | -4.4568        | 0.1610                                                                    | 0.8895                           | TGU (Cys)                       | 19    | -0.5259                    | 0.2786                                                                       | -0.0010        | 0.0004      | 0.2340                           | TGU (Cys)                       | 96    | -0.1326                    | 0.0176      | -0.0001        | 0.0001      | 0.0071                           |
| Gln   | 0.596               | Glutamine                            | UUG              | CAA             | 0                                         | 9.78                          | UUG                                  | CAA              | 0               | 6.28                                      | 5                             | UUG                                                                   | CAA              | 0               | 5.21                                      | 5                             | CAA (Gln)                                                                         | 96    | -0.9006                    | 0.8110      | -2.7653        | 0.1377                                                                    | 0.8090                           | CAA (Gln)                       | 19    | 0.1447                     | 0.0209                                                                       | 0.0002         | 0.0003      | -0.0367                          | CAA (Gln)                       | 96    | 0.2191                     | 0.0480      | 0.0001         | 0.0001      | 0.0379                           |
| CAU   | 1.404               | Glutamine                            | CUU              | CAG             | 0                                         | 13.44                         | CUU                                  | CAG              | 0               | 11.33                                     | 10.5                          | CUU                                                                   | CAG              | 0               | 10.82                                     | 10                            | CAG (Gln)                                                                         | 96    | 0.9006                     | 0.8110      | 2.7653         | 0.1377                                                                    | 0.8090                           | CAG (Gln)                       | 19    | -0.1447                    | 0.0209                                                                       | -0.0002        | 0.0003      | -0.0367                          | CAG (Gln)                       | 96    | -0.2191                    | 0.0480      | -0.0001        | 0.0001      | 0.0379                           |
| Glu   | 0.922               | Glutamic Acid                        | UUC              | GAA             | 0                                         | 16.17                         | UUC                                  | GAA              | 0               | 15.62                                     | 9                             | UUC                                                                   | GAA              | 0               | 14.00                                     | 9                             | GAA (Glu)                                                                         | 96    | -0.8659                    | 0.7497      | -2.8998        | 0.1728                                                                    | 0.7470                           | GAA (Glu)                       | 19    | 0.3372                     | 0.1137                                                                       | 0.0005         | 0.0003      | 0.0616                           | GAA (Glu)                       | 96    | 0.3976                     | 0.1581      | 0.0003         | 0.0001      | 0.1491                           |
| GAG   | 1.078               | Glutamic Acid                        | CUU              | GAG             | 0                                         | 16.78                         | CUU                                  | GAG              | 0               | 16.55                                     | 13                            | CUU                                                                   | GAG              | 0               | 14.09                                     | 12                            | GAG (Glu)                                                                         | 96    | 0.8659                     | 0.7497      | 2.8998         | 0.1728                                                                    | 0.7470                           | GAG (Glu)                       | 19    | -0.3372                    | 0.1137                                                                       | -0.0005        | 0.0003      | 0.0616                           | GAG (Glu)                       | 96    | -0.3976                    | 0.1581      | -0.0003        | 0.0001      | 0.1491                           |
| Gly   | 1.14                | Glycine                              | UCC              | CGA             | 0                                         | 16.55                         | UCC                                  | GGA              | 0               | 17.67                                     | 9                             | UCC                                                                   | GGA              | 0               | 16.64                                     | 9                             | GGA (Gly)                                                                         | 96    | -0.9588                    | 0.9193      | -5.4366        | 0.1661                                                                    | 0.9185                           | GGA (Gly)                       | 19    | -0.7540                    | 0.5685                                                                       | -0.0014        | 0.0003      | 0.5431                           | GGA (Gly)                       | 96    | -0.0821                    | 0.0085      | -0.0001        | 0.0001      | -0.0021                          |
| GCC   | 1.169               | Glycine                              | GCC              | GGC             | 0                                         | 18.86                         | GCC                                  | GGC              | 0               | 14.69                                     | 13                            | GCC                                                                   | GGC              | 0               | 13.85                                     | 12                            | GCC (Gly)                                                                         | 96    | 0.9466                     | 0.8960      | 6.8201         | 0.2397                                                                    | 0.8949                           | GCC (Gly)                       | 19    | 0.4576                     | 0.2094                                                                       | 0.0009         | 0.0004      | 0.1629                           | GCC (Gly)                       | 96    | -0.0711                    | 0.0051      | -0.0001        | 0.0001      | -0.0055                          |
| GGG   | 0.92                | Glycine                              | CCC              | GGG             | 0.054                                     | 6.76                          | CCC                                  | GGG              | 0               | 10.95                                     | 5.5                           | CCC                                                                   | GGG              | 0               | 9.21                                      | 6                             | GGG (Gly)                                                                         | 96    | 0.7758                     | 0.6019      | 3.0929         | 0.2594                                                                    | 0.5977                           | GGG (Gly)                       | 19    | 0.7575                     | 0.5737                                                                       | 0.0016         | 0.0003      | 0.5487                           | GGG (Gly)                       | 96    | 0.4099                     | 0.1080      | 0.0004         | 0.0001      | 0.1592                           |
| GGT   | 0.772               | Glycine                              | ACC              | GGU             | 0.870                                     | 8.01                          | ACC                                  | GGU              | 0.741           | 2.66                                      | 0                             | ACC                                                                   | GGU              | 0.758           | 4.21                                      | 0                             | GTT (Gly)                                                                         | 96    | -0.9317                    | 0.8349      | -4.4586        | 0.2045                                                                    | 0.8332                           | GTT (Gly)                       | 19    | -0.4979                    | 0.2479                                                                       | -0.0009        | 0.0004      | 0.2037                           | GTT (Gly)                       | 96    | -0.3393                    | 0.1151      | -0.0003        | 0.0001      | 0.1057                           |
| His   | 1.043               | Histidine                            | AUG              | CAU             | 0                                         | 12.80                         | AUG                                  | CAC              | 0               | 8.74                                      | 9                             | AUG                                                                   | CAC              | 0               | 8.61                                      | 8                             | CAC (His)                                                                         | 96    | 0.9307                     | 0.8662      | 5.2582         | 0.2131                                                                    | 0.8648                           | CAC (His)                       | 19    | -0.0950                    | 0.0090                                                                       | -0.0001        | 0.0004      | -0.0493                          | CAC (His)                       | 96    | -0.2703                    | 0.0731      | -0.0002        | 0.0001      | 0.0632                           |
| CAT   | 0.957               | Histidine                            | AUG              | CAU             | 0.928                                     | 0.10                          | AUG                                  | CAU              | 0.898           | 0.14                                      | 0                             | AUG                                                                   | CAU              | 0.848           | 0.24                                      | 0                             | CAT (His)                                                                         | 96    | -0.9307                    | 0.8662      | -5.2582        | 0.2131                                                                    | 0.8648                           | CAT (His)                       | 19    | 0.0950                     | 0.0090                                                                       | 0.0001         | 0.0004      | -0.0493                          | CAT (His)                       | 96    | 0.2703                     | 0.0731      | 0.0002         | 0.0001      | 0.0632                           |
| Ile   | 0.558               | Isoleucine                           | UAU              | AUA             | 0.004                                     | 7.05                          | UAU                                  | AUA              | 0               | 5.81                                      | 5                             | UAU                                                                   | AUA              | 0               | 6.24                                      | 5                             | AUA (Ile)                                                                         | 96    | -0.7112                    | 0.9058      | -1.6556        | 0.1888                                                                    | 0.9006                           | AUA (Ile)                       | 19    | 0.3625                     | 0.1314                                                                       | 0.0004         | 0.0003      | 0.0803                           | AUA (Ile)                       | 96    | 0.4243                     | 0.1801      | 0.0003         | 0.0001      | 0.1713                           |
| ATC   | 1.283               | Isoleucine                           | AUC              | AUC             | 0.780                                     | 2.41                          | AUC                                  | AUC              | 0.690           | 0.72                                      | 0                             | AUC                                                                   | AUC              | 0.667           | 1.03                                      | 0                             | ATC (Ile)                                                                         | 96    | 0.7873                     | 0.6198      | 5.0612         | 0.4089                                                                    | 0.6158                           | ATC (Ile)                       | 19    | -0.7885                    | 0.6217                                                                       | -0.0027        | 0.0005      | 0.5994                           | ATC (Ile)                       | 96    | -0.5485                    | 0.3008      | -0.0008        | 0.0001      | 0.2934                           |
| ATT   | 1.162               | Isoleucine                           | AUU              | AUU             | 0                                         | 15.97                         | AUU                                  | AUU              | 0               | 12.55                                     | 11                            | AUU                                                                   | AUU              | 0               | 13.38                                     | 11                            | ATT (Ile)                                                                         | 96    | -0.7806                    | 0.6993      | -3.4800        | 0.2874                                                                    | 0.6951                           | ATT (Ile)                       | 19    | 0.7590                     | 0.5789                                                                       | 0.0023         | 0.0005      | 0.5511                           | ATT (Ile)                       | 96    | 0.5407                     | 0.2524      | 0.0002         | 0.0001      | 0.2848                           |
| Leu   | 0.535               | Leucine                              | AUG              | CUA             | 0.013                                     | 6.11                          | UAG                                  | CUA              | 0               | 3.98                                      | 4                             | UAG                                                                   | CUA              | 0               | 4.00                                      | 4                             | CUA (Leu)                                                                         | 96    | -0.9140                    | 0.8354      | -3.9660        | 0.1816                                                                    | 0.8337                           | CUA (Leu)                       | 19    | -0.6087                    | 0.3705                                                                       | -0.0010        | 0.0003      | 0.3335                           | CUA (Leu)                       | 96    | -0.2806                    | 0.0787      | -0.0002        | 0.0001      | 0.0689                           |
| CTC   | 1.084               | Leucine                              | GAG              | CUC             | 0.946                                     | 0.07                          | GAG                                  | CUC              | 0.983           | 0.02                                      | 0                             | GAG                                                                   | CUC              |                 |                                           |                               |                                                                                   |       |                            |             |                |                                                                           |                                  |                                 |       |                            |                                                                              |                |             |                                  |                                 |       |                            |             |                |             |                                  |
